# Supplementary material
Source: MDPI journal article supplement (https://www.mdpi.com/2073-4344/9/6/503)
Supplement: s1 [file s1]

# Supplementary Materials: Iridium-Catalyzed Transfer Hydrogenation of Ketones and Aldehydes Using Glucose as a Sustainable Hydrogen Donor

Masato Yoshida, Ryota Hirahata, Takayoshi Inoue, Takuya Shimbayashi and Ken-ichi Fujita

## General

$^1\text{H}$  and  $^{13}\text{C}\{^1\text{H}\}$  NMR spectra were recorded on JEOL ECX-500 and ECS-400 spectrometers (JEOL Ltd., Tokyo, Japan). Gas chromatography (GC) analyses were performed on a GL-Sciences GC353B gas chromatograph (GL Sciences Inc., Tokyo, Japan) with a capillary column (GL-Sciences and InertCap Pure WAX (GL Sciences Inc., Tokyo, Japan)). Silica-gel column chromatography was carried out by using Wako-gel C-200 (FUJIFILM Wako Pure Chemical Corp., Osaka, Japan). Ketones and aldehydes were purchased from FUJIFILM Wako Pure Chemical Corp. (Osaka, Japan), Tokyo Chemical Industry Co., Ltd. (Tokyo, Japan) or nacalai tesque (Kyoto, Japan). Distilled water and *N,N*-dimethylacetamide (super dehydrated) were purchased from FUJIFILM Wako Pure Chemical Corp. (Osaka, Japan). The compounds,  $[\text{Cp}^*\text{IrCl}_2]_2$  ( $\text{Cp}^*$  = -pentamethylcyclopentadienyl) [1] and iridium complexes **1-4** were prepared according to the literature methods [2, 3, 4, 5].

## General procedure for transfer hydrogenation of acetophenone to 1-phenylethanol using glucose (Table 1)

In a 5 mL stainless-steel reactor under argon atmosphere, catalyst (0.1 mol% Ir), acetophenone (2.0 mmol), glucose (4.0 mmol), base (5.0 or 10.0 mol%) and degassed distilled water (3.0 mL) were placed. Then, the reactor was sealed with a stainless-steel stopper, and the mixture was stirred at 100 °C for 20 hours. After cooling to room temperature, the mixture was diluted with toluene (50 mL). The conversion of acetophenone and the yield of 1-phenylethanol were determined by GC analysis using biphenyl as an internal standard.

## General procedure for transfer hydrogenation of ketones to corresponding the corresponding secondary alcohols using glucose (Table 2)

### Conditions A

In a 5 mL stainless-steel reactor under argon atmosphere, catalyst **1** (10.6 mg, 0.020 mmol, 1.0 mol%), ketone (2.0 mmol), glucose (720.6 mg, 4.0 mmol, 2.0 equiv.),  $\text{Na}_2\text{CO}_3$  (10.6 mg, 0.10 mmol, 5.0 mol%) and degassed distilled water (3.0 mL) were placed. Then, the reactor was sealed with a stainless-steel stopper, and the mixture was stirred at 100 °C for 20 hours. After cooling to room temperature, the products were extracted with dichloromethane (20 mL  $\times$  3). After evaporation of the solvent, the yield was determined by  $^1\text{H}$  NMR analysis using 1,3,5-trimethoxybenzene as an internal standard. The products were isolated by column chromatography (eluent = ethyl acetate/hexane).

**1-Phenylethanol (6a)** [6]:  $^1\text{H}$  NMR (500 MHz,  $\text{CDCl}_3$ )  $\delta$  7.40–7.33 (m, 4H, aromatic), 7.31–7.25 (m, 1H, aromatic), 4.91 (qd,  $J$  = 6.5, 3.5 Hz, 1H,  $\text{CHOH}$ ), 1.85 (d, 3.5 Hz, 1H,  $\text{CHOH}$ ), 1.50 (d,  $J$  = 6.0 Hz, 3H,  $\text{CH}_3$ ).  $^{13}\text{C}\{^1\text{H}\}$  NMR (125 MHz,  $\text{CDCl}_3$ )  $\delta$  145.9, 128.6, 127.5, 125.5, 70.4, 25.2.

**1-(3'-Methylphenyl)ethanol (6b)** [7]:  $^1\text{H}$  NMR (400 MHz,  $\text{CDCl}_3$ )  $\delta$  7.25 (t,  $J$  = 8.0 Hz, 1H, aromatic), 7.23–7.15 (m, 2H, aromatic), 7.09 (d,  $J$  = 7.2 Hz, 1H, aromatic), 4.87 (qd,  $J$  = 6.4, 2.8 Hz, 1H,  $\text{CH(OH)CH}_3$ ), 2.36 (s, 3H,  $\text{ArCH}_3$ ), 1.80 (br, 1H, OH), 1.49 (d,  $J$  = 6.4 Hz, 3H,  $\text{CH(OH)CH}_3$ ).  $^{13}\text{C}\{^1\text{H}\}$  NMR (100 MHz,  $\text{CDCl}_3$ )  $\delta$  145.9, 138.3, 128.6, 128.4, 126.2, 122.6, 70.6, 25.3, 21.6.

**1-(4'-Trifluoromethylphenyl)ethanol (6c)** [7]:  $^1\text{H}$  NMR (400 MHz,  $\text{CDCl}_3$ )  $\delta$  7.57 (d,  $J$  = 8.0 Hz, 2H, aromatic), 7.42 (d,  $J$  = 8.4 Hz, 2H, aromatic), 4.88 (q,  $J$  = 2.4 Hz, 1H,  $-\text{CH(OH)CH}_3$ ), 2.93 (br, 1H, OH), 1.44 (d,  $J$  = 6.4 Hz, 3H,  $\text{CH}_3$ ).  $^{13}\text{C}\{^1\text{H}\}$  NMR (100 MHz,  $\text{CDCl}_3$ )  $\delta$  149.8, 129.6 (q,  $J_{\text{CF}_3}$  = 31.7 Hz), 125.7, 125.4 (q,  $J_{\text{CF}_3}$  = 3.9 Hz), 124.3 (q,  $J_{\text{CF}_3}$  = 271.2 Hz), 69.8, 25.3.

**1-(4'-Nitrophenyl)ethanol (6d)** [6]:  $^1\text{H}$  NMR (500 MHz,  $\text{CDCl}_3$ )  $\delta$  8.20 (dt,  $J$  = 9.0, 2.0 Hz, 2H, aromatic), 7.55 (ddt,  $J$  = 8.5, 2.0, 0.5 Hz, 2H, aromatic), 5.03 (q,  $J$  = 6.5 Hz, 1H,  $\text{CH}(\text{OH})\text{CH}_3$ ), 2.16 (br, 1H, OH), 1.52 (d,  $J$  = 6.5 Hz,  $\text{CH}_3$ ).  $^{13}\text{C}\{^1\text{H}\}$  NMR (125 MHz,  $\text{CDCl}_3$ )  $\delta$  153.2, 147.3, 126.2, 123.9, 69.6, 25.6.

**1-(4'-Cyanophenyl)ethanol (6e)** [8]:  $^1\text{H}$  NMR (500 MHz,  $\text{CDCl}_3$ )  $\delta$  7.65 (dd,  $J$  = 8.5, 1.0 Hz, 2H, aromatic), 7.49 (d,  $J$  = 8.0 Hz, 2H, aromatic), 4.97 (ddd,  $J$  = 13.0, 4.0, 2.5 Hz,  $\text{CH}(\text{OH})\text{CH}_3$ ), 1.92 (d,  $J$  = 4.0 Hz, OH), 1.50 (d,  $J$  = 6.0 Hz, 3H,  $\text{CH}_3$ ).  $^{13}\text{C}\{^1\text{H}\}$  NMR (100 MHz,  $\text{CDCl}_3$ )  $\delta$  151.4, 132.2, 126.1, 118.9, 110.5, 69.3, 25.2.

**Methyl-4-(1-hydroxyethyl)benzoate (6f)** [9]:  $^1\text{H}$  NMR (500 MHz,  $\text{CDCl}_3$ )  $\delta$  8.00 (dt,  $J$  = 8.0, 2.0 Hz, 2H, aromatic), 7.43 (d,  $J$  = 8.0 Hz, 2H, aromatic), 4.95 (q,  $J$  = 5.5 Hz, 1H,  $\text{CH}(\text{OH})\text{CH}_3$ ), 3.90 (s, 3H,  $\text{C}(\text{O})\text{OCH}_3$ ), 2.19 (br, 1H, OH), 1.49 (d,  $J$  = 6.5 Hz, 3H,  $\text{CH}(\text{OH})\text{CH}_3$ ).  $^{13}\text{C}\{^1\text{H}\}$  NMR (125 MHz,  $\text{CDCl}_3$ )  $\delta$  167.1, 151.1, 130.0, 129.3, 125.4, 70.1, 52.2, 25.4.

**2,2,2-Trifluoro-1-phenylethanol (6g)** [10]:  $^1\text{H}$  NMR (400 MHz,  $\text{CDCl}_3$ )  $\delta$  7.52-7.45 (m, 2H, aromatic), 7.45-7.37 (m, 3H, aromatic), 5.03 (m, 1H,  $\text{CHOHCF}_3$ ), 2.60-2.58 (br, 1H, OH).  $^{13}\text{C}\{^1\text{H}\}$  NMR (100 MHz,  $\text{CDCl}_3$ )  $\delta$  134.0, 129.7, 128.8, 127.6, 124.3 (q,  $J_{\text{CF}_3}$  = 280.1 Hz), 72.9 (q,  $J_{\text{CF}_3}$  = 32.1 Hz).

**1-Phenyl-1-propanol (6h)** [11]:  $^1\text{H}$  NMR (500 MHz,  $\text{CDCl}_3$ )  $\delta$  7.40-7.31 (m, 4H, aromatic), 7.29-7.23 (m, 1H, aromatic), 4.58 (t,  $J$  = 6.5 Hz, 1H,  $\text{CH}(\text{OH})\text{CH}_2\text{CH}_3$ ), 1.96-1.98 (br, 1H, OH), 1.86-1.70 (m, 2H,  $\text{CH}(\text{OH})\text{CH}_2\text{CH}_3$ ), 0.91 (t,  $J$  = 7.5 Hz,  $\text{CH}(\text{OH})\text{CH}_2\text{CH}_3$ ).  $^{13}\text{C}\{^1\text{H}\}$  NMR (125 MHz,  $\text{CDCl}_3$ )  $\delta$  144.7, 128.5, 127.6, 126.1, 76.1, 32.0, 10.3.

**4-Phenylbutan-2-ol (6i)** [11]:  $^1\text{H}$  NMR (500 MHz,  $\text{CDCl}_3$ )  $\delta$  7.31-7.26 (m, 2H, aromatic), 7.23-7.17 (m, 3H, aromatic), 3.84 (sep,  $J$  = 6.0 Hz, 1H,  $\text{CH}(\text{OH})$ ), 2.80-2.64 (m, 2H,  $\text{CH}_2\text{CH}_3$ ), 1.85-1.72 (m, 2H,  $\text{CH}_2$ ), 1.34 (br, 1H, OH), 1.23 (d,  $J$  = 6.5 Hz, 3H,  $\text{CH}_3$ ).  $^{13}\text{C}\{^1\text{H}\}$  NMR (125 MHz,  $\text{CDCl}_3$ )  $\delta$  142.2, 128.5, 125.9, 67.5, 40.9, 32.2, 23.7.

**Cyclohexanol (6j)** [11]:  $^1\text{H}$  NMR (500 MHz,  $\text{CDCl}_3$ )  $\delta$  3.61 (m, 1H,  $\text{CH}_2\text{CHOHCH}_2$ ), 1.92-1.88 (m, 2H,  $\text{CH}_2$ ), 1.78-1.68 (m, 2H,  $\text{CH}_2$ ), 1.59-1.51 (m, 1H,  $\text{CH}_2$ ), 1.37 (s, 1H,  $\text{CH}_2$ ), 1.35-1.24 (m, 4H,  $\text{CH}_2$ ), 1.22-1.12 (m, 1H,  $\text{CH}_2$ ).  $^{13}\text{C}\{^1\text{H}\}$  NMR (125 MHz,  $\text{CDCl}_3$ )  $\delta$  70.4, 35.6, 25.5, 24.3.

**Cycloheptanol (6k)** [12]:  $^1\text{H}$  NMR (500 MHz,  $\text{CDCl}_3$ )  $\delta$  3.85 (m, 1H,  $\text{CH}_2\text{CHOHCH}_2$ ), 1.92 (m, 2H,  $\text{CH}_2$ ), 1.65 (m, 2H,  $\text{CH}_2$ ), 1.61-1.50 (m, 6H,  $\text{CH}_2$ ), 1.40 (m, 2H,  $\text{CH}_2$ ), 1.30 (br, 1H, OH).  $^{13}\text{C}\{^1\text{H}\}$  NMR (100 MHz,  $\text{CDCl}_3$ )  $\delta$  72.9, 37.7, 28.2, 22.7.

### Conditions B

In a 5 mL stainless-steel reactor under argon atmosphere, catalyst **1** (10.6 mg, 0.020 mmol, 1.0 mol%), ketone (2.0 mmol), glucose (720.6 mg, 4.0 mmol, 2.0 equiv.),  $\text{Na}_2\text{CO}_3$  (10.6 mg, 0.10 mmol, 5.0 mol%) and *N,N*-dimethylacetamide (3.0 mL) were placed. Then, the reactor was sealed with a stainless-steel stopper, and the mixture was stirred at 100 °C for 20 hours. After cooling to room temperature, the reaction mixture was poured into water (50 mL) and the products were extracted with a mixed solvent having a volume ratio of hexane :  $\text{AcOEt}$  of 1 : 1 (20 mL  $\times$  3). After evaporation of the solvent, the yield was determined by  $^1\text{H}$  NMR analysis using 1,3,5-trimethoxybenzene as an internal standard. The products were isolated by column chromatography (eluent = ethyl acetate/hexane).

**1-(4'-Methoxyphenyl)ethanol (6l)** [6]:  $^1\text{H}$  NMR (500 MHz,  $\text{CDCl}_3$ )  $\delta$  7.31 (dt,  $J$  = 8.5, 2.0 Hz, 2H, aromatic), 6.89 (dt,  $J$  = 9.0, 2.0 Hz, 2H, aromatic), 4.86 (q,  $J$  = 6.0 Hz, 1H,  $\text{CHOH}$ ), 3.81 (s, 3H, OMe), 1.78-1.75 (br, 1H, OH), 1.48 (d,  $J$  = 6.5 Hz, 3H,  $\text{CH}_3$ ).  $^{13}\text{C}\{^1\text{H}\}$  NMR (125 MHz,  $\text{CDCl}_3$ )  $\delta$  159.1, 138.1, 126.8, 113.9, 70.1, 55.4, 25.2.

**1-(2'-Methoxyphenyl)ethanol (6m)** [12]:  $^1\text{H}$  NMR (500 MHz,  $\text{CDCl}_3$ )  $\delta$  7.34 (dd,  $J$  = 7.5, 1.5 Hz, 1H, aromatic), 7.28-7.22 (m, 1H, aromatic), 6.97 (td,  $J$  = 7.5, 1.0 Hz, 1H, aromatic), 6.88 (d,  $J$  = 8.0 Hz, 1H, aromatic), 5.09 (quint,  $J$  = 6.5 Hz,  $\text{CH}(\text{OH})\text{CH}_3$ ), 3.87 (s, 3H, OMe), 2.69 (d,  $J$  = 5.0 Hz, OH), 1.51 (d,  $J$  = 7.0 Hz,  $\text{CH}(\text{OH})\text{CH}_3$ ).  $^{13}\text{C}\{^1\text{H}\}$  NMR (125 MHz,  $\text{CDCl}_3$ )  $\delta$  156.7, 133.5, 128.4, 126.2, 120.9, 110.5, 66.7, 55.4, 22.9.

**1-(4'-Chlorophenyl)ethanol (6n)** [6]:  $^1\text{H}$  NMR (500 MHz,  $\text{CDCl}_3$ )  $\delta$  7.35-7.27 (m, 4H, aromatic), 4.89 (m, 1H,  $\text{CHOH}$ ), 1.91-1.84 (br, 1H,  $\text{CHOH}$ ), 1.47 (d,  $J$  = 6.5 Hz, 3H,  $\text{CH}_3$ ).  $^{13}\text{C}\{^1\text{H}\}$  NMR (125 MHz,  $\text{CDCl}_3$ )  $\delta$  144.3, 133.2, 128.7, 126.9, 69.9, 25.4.

1-(3'-Chlorophenyl)ethanol (**6o**) [7]:  $^1\text{H}$  NMR (500 MHz,  $\text{CDCl}_3$ )  $\delta$  7.37 (t,  $J$  = 2.0 Hz, 1H, aromatic), 7.30-7.22 (m, 3H, aromatic), 4.88 (qd,  $J$  = 6.5, 3.5 Hz,  $\text{CH}(\text{OH})\text{CH}_3$ ), 1.92 (d,  $J$  = 3.5 Hz, 1H, OH), 1.48 (d,  $J$  = 6.5 Hz, 3H,  $\text{CH}_3$ ).  $^{13}\text{C}\{^1\text{H}\}$  NMR (125 MHz,  $\text{CDCl}_3$ )  $\delta$  148.0, 134.5, 129.9, 127.7, 125.8, 123.7, 70.0, 25.4.

1-(2'-Chlorophenyl)ethanol (**6p**) [13]:  $^1\text{H}$  NMR (500 MHz,  $\text{CDCl}_3$ )  $\delta$  7.58 (dd,  $J$  = 8.0, 2.0 Hz, 1H, aromatic), 7.33-7.27 (m, 2H, aromatic), 7.20 (td,  $J$  = 8.0, 2.0 Hz, 1H, aromatic), 5.28 (qd, 6.5, 3.5 Hz, 1H,  $\text{CH}(\text{OH})\text{CH}_3$ ), 2.13 (d,  $J$  = 4.0 Hz, 1H, OH), 1.48 (d,  $J$  = 6.5 Hz,  $\text{CH}_3$ ).  $^{13}\text{C}\{^1\text{H}\}$  NMR (125 MHz,  $\text{CDCl}_3$ )  $\delta$  143.2, 131.7, 129.5, 128.5, 127.3, 126.4, 67.1, 23.6.

1-(4'-Bromophenyl)ethanol (**6q**) [6]:  $^1\text{H}$  NMR (500 MHz,  $\text{CDCl}_3$ )  $\delta$  7.46 (dt,  $J$  = 8.5, 2.5, 1.5 Hz, 2H, aromatic), 7.24 (d,  $J$  = 8.5 Hz, 2H, aromatic), 4.85 (q,  $J$  = 6.5 Hz, 1H,  $\text{CH}(\text{OH})\text{CH}_3$ ), 1.98 (br, 1H, OH), 1.46 (d,  $J$  = 6.5 Hz, 3H,  $\text{CH}(\text{OH})\text{CH}_3$ ).  $^{13}\text{C}\{^1\text{H}\}$  NMR (125 MHz,  $\text{CDCl}_3$ )  $\delta$  144.9, 131.7, 127.3, 121.3, 69.9, 25.4.

*General procedure for transfer hydrogenation of aldehydes to the corresponding primary alcohols using glucose (Table 3)*

### Conditions A

In a 5 mL stainless-steel reactor under argon atmosphere, catalyst **1** (10.6 mg, 0.020 mmol, 1.0 mol%), aldehyde (2.0 mmol), glucose (720.6 mg, 4.0 mmol, 2.0 equiv.),  $\text{Na}_2\text{CO}_3$  (10.6 mg, 0.10 mmol, 5.0 mol%) and degassed distilled water (3.0 mL) were placed. Then, the reactor was sealed with a stainless-steel stopper, and the mixture was stirred at 100 °C for 20 hours. After cooling to room temperature, the products were extracted with dichloromethane (20 mL  $\times$  3). After evaporation of the solvent, the yields were determined by  $^1\text{H}$  NMR analysis using 1,3,5-trimethoxybenzene as an internal standard. The products were isolated by column chromatography (eluent = ethyl acetate/hexane).

Benzyl alcohol (**8a**) [14]:  $^1\text{H}$  NMR (500 MHz,  $\text{CDCl}_3$ )  $\delta$  7.41-7.35 (m, 4H, aromatic), 7.33-7.28 (m, 1H, aromatic), 4.70 (d,  $J$  = 6.0 Hz, 2H,  $\text{CH}_2(\text{OH})$ ), 1.75 (t,  $J$  = 6.0 Hz, 1H, OH).  $^{13}\text{C}\{^1\text{H}\}$  NMR (125 MHz,  $\text{CDCl}_3$ )  $\delta$  141.0, 128.6, 127.7, 127.1, 65.2.

*p*-Methylbenzyl alcohol (**8b**) [14]:  $^1\text{H}$  NMR (500 MHz,  $\text{CDCl}_3$ )  $\delta$  7.21 (d,  $J$  = 8.0 Hz, 2H, aromatic), 7.14 (d,  $J$  = 8.0 Hz, 2H, aromatic), 4.57 (d,  $J$  = 3.5 Hz, 2H,  $\text{ArCH}_2\text{OH}$ ), 2.33 (s, 3H, Me), 2.23-2.12 (br, 1H, OH).  $^{13}\text{C}\{^1\text{H}\}$  NMR (125 MHz,  $\text{CDCl}_3$ )  $\delta$  138.0, 137.4, 129.3, 127.2, 65.2, 21.2.

*p*-Cyanobenzyl alcohol (**8c**) [12]:  $^1\text{H}$  NMR (500 MHz,  $\text{CDCl}_3$ )  $\delta$  7.62-7.57 (m, 2H, aromatic), 7.46-7.41 (m, 2H, aromatic), 4.73 (s, 2H,  $\text{CH}_2$ ), 2.61 (br, 1H, OH).  $^{13}\text{C}\{^1\text{H}\}$  NMR (125 MHz,  $\text{CDCl}_3$ )  $\delta$  146.5, 132.3, 127.1, 119.0, 110.9, 64.1.

*m*-Nitrobenzyl alcohol (**8d**) [15]:  $^1\text{H}$  NMR (500 MHz,  $\text{CDCl}_3$ )  $\delta$  8.26 (s, 1H, aromatic), 8.16 (dd,  $J$  = 8.5, 1.0 Hz, 1H, aromatic), 7.71 (dd,  $J$  = 8.0, 1.0 Hz, 1H, aromatic), 7.54 (t,  $J$  = 8.0 Hz, 1H, aromatic), 4.84 (s, 2H,  $\text{CH}_2$ ), 1.95 (br, 1H, OH).  $^{13}\text{C}\{^1\text{H}\}$  NMR (125 MHz,  $\text{CDCl}_3$ )  $\delta$  148.4, 143.0, 132.8, 129.6, 122.6, 121.6, 64.0.

*o*-Nitrobenzyl alcohol (**8e**) [15]:  $^1\text{H}$  NMR (500 MHz,  $\text{CDCl}_3$ )  $\delta$  8.12 (dd,  $J$  = 8.0, 1.0 Hz, 1H, aromatic), 7.75 (d,  $J$  = 7.0 Hz, 1H, aromatic), 7.69 (td,  $J$  = 7.5, 1.0 Hz, 1H, aromatic), 7.49 (td,  $J$  = 8.0, 1.0 Hz, 1H, aromatic), 4.99 (d,  $J$  = 6.0 Hz, 2H,  $-\text{CH}(\text{OH})-$ ), 2.53 (t,  $J$  = 7.0 Hz, 1H, OH).  $^{13}\text{C}\{^1\text{H}\}$  NMR (125 MHz,  $\text{CDCl}_3$ )  $\delta$  147.7, 136.9, 134.3, 130.2, 128.7, 125.2, 62.7.

Methyl-4-(hydroxymethyl)benzoate (**8f**) [16]:  $^1\text{H}$  NMR (500 MHz,  $\text{CDCl}_3$ )  $\delta$  7.95 (d,  $J$  = 8.0 Hz, 2H, aromatic), 7.37 (d,  $J$  = 8.0 Hz, 2H, aromatic), 4.69 (s, 2H,  $\text{CH}_2(\text{OH})$ ), 3.88 (s, 3H,  $\text{OCH}_3$ ), 3.21 (br, 1H, OH).  $^{13}\text{C}\{^1\text{H}\}$  NMR (125 MHz,  $\text{CDCl}_3$ )  $\delta$  167.2, 146.3, 129.8, 129.0, 126.4, 64.4, 52.2.

### Conditions B

In a 5 mL stainless-steel reactor under argon atmosphere, catalyst **1** (10.6 mg, 0.020 mmol, 1.0 mol%), aldehyde (2.0 mmol), glucose (720.6 mg, 4.0 mmol, 2.0 equiv.),  $\text{Na}_2\text{CO}_3$  (10.6 mg, 0.10 mmol, 5.0 mol%) and *N,N*-dimethylacetamide (3.0 mL) were placed. Then, the reactor was sealed with a stainless-steel stopper, and the mixture was stirred at 100 °C for 20 hours. After cooling to room temperature, the reaction mixture was poured into water (50 mL) and the products were extracted with a mixed solvent having a volume ratio of hexane :  $\text{AcOEt}$  of 1 : 1 (20 mL  $\times$  3). After evaporation of the solvent, the yield was determined by  $^1\text{H}$  NMR analysis using 1,3,5-trimethoxybenzene as an

internal standard. The products were isolated by column chromatography (eluent = ethyl acetate/hexane).

*p*-Methoxybenzyl alcohol (**8g**) [14]:  $^1\text{H}$  NMR (500 MHz,  $\text{CDCl}_3$ )  $\delta$  7.28 (dt,  $J$  = 9.0, 3.0, 2.0 Hz, 2H, aromatic), 6.89 (dt,  $J$  = 8.5, 3.0, 2.0 Hz, 2H, aromatic), 4.60 (s, 2H,  $\text{CH}_2$ ), 3.80 (s, 3H, OMe), 1.87 (br, 1H, OH).  $^{13}\text{C}\{^1\text{H}\}$  NMR (125 MHz,  $\text{CDCl}_3$ )  $\delta$  159.2, 133.2, 128.8, 114.0, 65.1, 55.4.

*p*-Chlorobenzyl alcohol (**8h**) [14]:  $^1\text{H}$  NMR (500 MHz,  $\text{CDCl}_3$ )  $\delta$  7.34–7.23 (m, 4H, aromatic), 4.62 (s, 2H,  $\text{ArCH}_2\text{OH}$ ), 2.21 (br, 1H,  $\text{ArCH}_2\text{OH}$ ).  $^{13}\text{C}\{^1\text{H}\}$  NMR (125 MHz,  $\text{CDCl}_3$ )  $\delta$  139.3, 133.4, 128.8, 128.4, 64.6.

*p*-Bromobenzyl alcohol (**8i**) [12]:  $^1\text{H}$  NMR (500 MHz,  $\text{CDCl}_3$ )  $\delta$  7.48 (dt,  $J$  = 8.5, 2.0 Hz, 2H, aromatic), 7.23 (d,  $J$  = 8.5 Hz, 2H, aromatic), 4.65 (s, 2H,  $\text{CH}_2$ ), 1.87 (br, 1H, OH).  $^{13}\text{C}\{^1\text{H}\}$  NMR (125 MHz,  $\text{CDCl}_3$ )  $\delta$  139.8, 131.7, 128.7, 121.6, 64.7.

*p*-tert-Butylbenzyl alcohol (**8j**) [17]:  $^1\text{H}$  NMR (500 MHz,  $\text{CDCl}_3$ )  $\delta$  7.39 (d,  $J$  = 8.0 Hz, 2H, aromatic), 7.30 (d,  $J$  = 8.5 Hz, 2H, aromatic), 4.64 (d,  $J$  = 1.5 Hz, 2H,  $\text{CH}_2$ ), 1.32 (d,  $J$  = 2.0 Hz, 9H,  $\text{C}(\text{CH}_3)_3$ ).  $^{13}\text{C}\{^1\text{H}\}$  NMR (125 MHz,  $\text{CDCl}_3$ )  $\delta$  150.8, 138.0, 127.0, 125.6, 65.2, 34.6, 31.5.

2,6-Dichlorobenzyl alcohol (**8k**) [18]:  $^1\text{H}$  NMR (500 MHz,  $\text{CDCl}_3$ )  $\delta$  7.34–7.28 (m, 2H, aromatic), 7.18 (m, 1H, aromatic), 4.95 (d,  $J$  = 3.5 Hz,  $\text{CH}_2\text{OH}$ ), 2.31 (br, 1H, OH).  $^{13}\text{C}\{^1\text{H}\}$  NMR (125 MHz,  $\text{CDCl}_3$ )  $\delta$  136.0, 135.7, 129.9, 128.5, 60.2.

2-Naphthalenemethanol (**8l**) [19]:  $^1\text{H}$  NMR (500 MHz,  $\text{CDCl}_3$ )  $\delta$  7.83–7.75 (m, 3H, aromatic), 7.72 (s, 1H, aromatic), 7.49–7.38 (m, 3H, aromatic), 4.76 (s, 2H,  $\text{CH}_2$ ), 2.33 (br, 1H, OH).  $^{13}\text{C}\{^1\text{H}\}$  NMR (125 MHz,  $\text{CDCl}_3$ )  $\delta$  138.3, 133.4, 133.0, 128.3, 128.0, 127.8, 126.2, 126.0, 125.5, 125.3, 65.4.

1-Naphthalenemethanol (**8m**) [15]:  $^1\text{H}$  NMR (500 MHz,  $\text{CDCl}_3$ )  $\delta$  8.04 (d,  $J$  = 8.0 Hz, 1H, aromatic), 7.88–7.74 (m, 2H, aromatic), 7.54–7.36 (m, 4H, aromatic), 5.05 (s, 2H,  $\text{CH}_2$ ), 2.30–2.10 (br, 1H, OH).  $^{13}\text{C}\{^1\text{H}\}$  NMR (125 MHz,  $\text{CDCl}_3$ )  $\delta$  136.3, 133.8, 131.3, 128.7, 128.6, 126.4, 126.0, 125.5, 125.4, 123.7, 63.6.

Preparation of 2,3,4,6-tetra-*O*-methyl-*D*-glucopyranose (**10**). (Equation 2) [20]

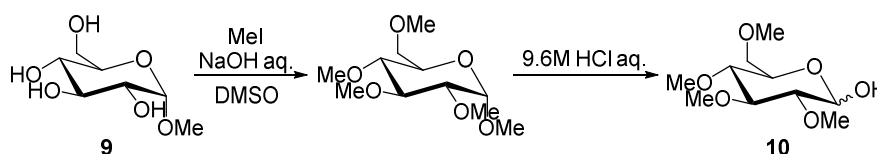

In a two-necked round-bottomed flask, aqueous NaOH (50 wt%, 4.0 mL), methyl  $\alpha$ -D-glucopyranoside (**9**) (1.94 g, 10.0 mmol) and DMSO (35 mL) were placed. After stirring the mixture at room temperature for 5 minutes, iodomethane (3.3 mL, 50 mmol) was added. The mixture was stirred at room temperature for 4 hours. The reaction mixture was poured into water (100 mL) and extracted with EtO. An intermediate product was obtained after evaporation of the organic layer. (colorless oil, 1.64 g, 6.5 mmol, 65% yield).

In a round-bottomed flask, above intermediate product (1.64 g, 6.5 mmol) and aqueous HCl (9.6 M, 25 mL) were placed. The mixture was stirred at 60 °C for 16 hours. After cooling to room temperature, the crude product was obtained by evaporation of the reaction mixture. After purifying by column chromatography (eluent = EtOH/ $\text{CH}_2\text{Cl}_2$ ), the product **10** was obtained (653.5 mg, 2.8 mmol, 43% yield).

2,3,4,6-tetra-*O*-methyl-*D*-glucopyranose (**10**)  $^1\text{H}$  NMR (500 MHz,  $\text{CDCl}_3$ )  $\delta$  5.31 (d,  $J$  = 3.5 Hz, 1H), 4.56 (d,  $J$  = 7.5 Hz, 0.5H), 3.91 (dt,  $J$  = 10.5 Hz, 2.5 Hz, 1H), 3.70 (q,  $J$  = 7.0 Hz, 1H), 3.66–3.60 (m, 6H), 3.59–3.5 (m, 6H), 3.53–3.50 (m, 4H), 3.42–3.30 (m, 5H), 3.22–3.05 (m, 3H), 2.97 (dd,  $J$  = 9.0, 8.0 Hz, 0.5 H).  $^{13}\text{C}$  NMR (125 MHz,  $\text{CDCl}_3$ )  $\delta$  96.9, 90.5, 86.4, 84.7, 83.1, 81.9, 79.7, 79.7, 74.1, 71.6, 71.4, 69.6, 60.9, 60.8, 60.5, 60.4, 59.1, 58.7.

Reaction of acetophenone using  $\alpha$ -D-glucopyranoside (**9**) (equation 1)

In a 5 mL stainless-steel reactor under argon atmosphere, catalyst **1** (1.0 mg, 0.002 mmol, 0.1 mol%Ir), acetophenone (240.5 mg, 2.0 mmol),  $\alpha$ -D-glucopyranoside (777.3 mg, 4.0 mmol, 2.0 equiv.),  $\text{Na}_2\text{CO}_3$  (10.5 mg, 0.1 mmol, 5.0 mol%) and degassed distilled water (3.0 mL) were placed. Then, the reactor was sealed with a stainless-steel stopper, and the mixture was stirred at 100 °C for 20 hours.

After cooling to room temperature, the mixture was diluted with toluene (50 mL). The conversion of acetophenone and the yield of 1-phenylethanol were determined by GC analysis using biphenyl as an internal standard. No reaction occurred.

*Reaction of acetophenone using 2,3,4,6-tetra-O-methyl-D-glucopyranose (10) (equation 2)*

In a 5 mL stainless-steel reactor under argon atmosphere, catalyst **1** (1.1 mg, 0.002 mmol, 0.2 mol%Ir), acetophenone (120.6 mg, 1.0 mmol), 2,3,4,6-tetra-O-methyl-D-glucopyranose (472.4 mg, 2.0 mmol, 2.0 equiv.), Na<sub>2</sub>CO<sub>3</sub> (5.4 mg, 0.05 mmol, 5 mol%) and degassed distilled water (1.5 mL) were placed. Then, the reactor was sealed with a stainless-steel stopper, and the mixture was stirred at 100 °C for 20 hours. After cooling to room temperature, the mixture was diluted with toluene (25 mL). The conversion of acetophenone and the yield of 1-phenylethanol were determined by GC analysis using biphenyl as an internal standard. The conversion and the yield were 97% and 97%, respectively.

## References

1. Ball, R.G.; Graham, W.A.G.; Heinekey, D.M.; Hoyano, J.K.; McMaster, A.D.; Mattson, B.M.; Michel, S.T.; Synthesis and structure of dicarbonylbis(η-pentamethylcyclopentadienyl)diiridium. *Inorg. Chem.* **1990**, *29*, 2023–2025. <https://doi.org/10.1021/ic00335a051>
2. Kawahara Ryoko; Fujita Ken-ichi; Yamaguchi Ryohei Cooperative Catalysis by Iridium Complexes with a Bipyridonate Ligand: Versatile Dehydrogenative Oxidation of Alcohols and Reversible Dehydrogenation–Hydrogenation between 2-Propanol and Acetone. *Angew. Chem. Int. Ed.* **2012**, *124*, 12790–12794. <https://doi.org/10.1002/anie.201206987>
3. Kuwahara, M.; Nishioka, M.; Yoshida, M.; Fujita, K. A Sustainable Method for the Synthesis of Acetic Acid Based on Dehydrogenation of an Ethanol–Water Solution Catalyzed by an Iridium Complex Bearing a Functional Bipyridonate Ligand. *ChemCatChem* **2018**, *10*, 3636–3640. <https://doi.org/10.1002/cctc.201800680>
4. Fujita, K.; Wada, T.; Shiraishi, T. Reversible Interconversion between 2,5-Dimethylpyrazine and 2,5-Dimethylpiperazine by Iridium-Catalyzed Hydrogenation/Dehydrogenation for Efficient Hydrogen Storage. *Angew. Chem. Int. Ed.* **2017**, *56*, 10886–10889. <https://doi.org/10.1002/anie.201705452>
5. Kawahara, R.; Fujita, K.; Yamaguchi, R. Dehydrogenative Oxidation of Alcohols in Aqueous Media Using Water-Soluble and Reusable Cp\*Ir Catalysts Bearing a Functional Bipyridine Ligand. *J. Am. Chem. Soc.* **2012**, *134*, 3643–3646. <https://doi.org/10.1021/ja210857z>
6. Nogueira Fernandes, J.L.; Souza, M.C. de; Brenelli, E.C.S.; Brenelli, J.A. Reduction of Acetophenones Using Borohydride Exchange Resins (BER) and a BER-Lithium Salt System. *Synthesis* **2009**, *2009*, 4058–4062. <https://doi.org/10.1055/s-0029-1217040>
7. Yamamoto, Y.; Hasegawa, H.; Yamataka, H. Dynamic Path Bifurcation in the Beckmann Reaction: Support from Kinetic Analyses. *J. Org. Chem.* **2011**, *76*, 4652–4660. <https://doi.org/10.1021/jo200728t>
8. Bastin, S.; Eaves, R.J.; Edwards, C.W.; Ichihara, O.; Whittaker, M.; Wills, M. A Soluble-Polymer System for the Asymmetric Transfer Hydrogenation of Ketones. *J. Org. Chem.* **2004**, *69*, 5405–5412. <https://doi.org/10.1021/jo049479u>
9. Rahaim, R.J.; Maleczka, R.E. C–O Hydrogenolysis Catalyzed by Pd-PMHS Nanoparticles in the Company of Chloroarenes. *Org. Lett.* **2011**, *13*, 584–587. <https://doi.org/10.1021/ol102757v>
10. Hevia, E.; Kennedy, A.R.; Klett, J.; Livingstone, Z.; McCall, M.D. New insights into addition reactions of dialkylzinc reagents to trifluoromethyl ketones: Structural authentication of a β-hydride elimination product containing a tetranuclear zinc chain. *Dalton Trans.* **2009**, *39*, 520–526. <https://doi.org/10.1039/B911818G>
11. Maytum, H.C.; Francos, J.; Whatrup, D.J.; Williams, J.M.J. 1,4-Butanediol as a Reducing Agent in Transfer Hydrogenation Reactions. *Chem. Asian J.* **2010**, *5*, 538–542. <https://doi.org/10.1002/asia.200900527>
12. Castro, L.C.M.; Bézier, D.; Sortais, J.-B.; Darcel, C. Iron Dihydride Complex as the Pre-catalyst for Efficient Hydrosilylation of Aldehydes and Ketones Under Visible Light Activation. *Adv. Synth. Catal.* **2011**, *353*, 1279–1284. <https://doi.org/10.1002/adsc.201000676>
13. Azerraf, C.; Gelman, D. New Shapes of PC(sp<sup>3</sup>)P Pincer Complexes. *Organometallics* **2009**, *28*, 6578–6584. <https://doi.org/10.1021/om900723s>

14. Koren-Selfridge, L.; Londino, H.N.; Vellucci, J.K.; Simmons, B.J.; Casey, C.P.; Clark, T.B. A Boron-Substituted Analogue of the Shvo Hydrogenation Catalyst: Catalytic Hydroboration of Aldehydes, Imines, and Ketones. *Organometallics* **2009**, *28*, 2085–2090. <https://doi.org/10.1021/om801228m>
15. Basu, B.; Mandal, B.; Das, S.; Das, P.; Nanda, A.K. Chemoselective reduction of aldehydes by ruthenium trichloride and resin-bound formates. *Beilstein J. Org. Chem.* **2008**, *4*, 53. <https://doi.org/10.3762/bjoc.4.53>
16. Shaikh, N.S.; Junge, K.; Beller, M. A Convenient and General Iron-Catalyzed Hydrosilylation of Aldehydes. *Org. Lett.* **2007**, *9*, 5429–5432. <https://doi.org/10.1021/ol7021802>
17. Dieskau, A.P.; Begouin, J.-M.; Plietker, B. Bu<sub>4</sub>N[Fe(CO)<sub>3</sub>(NO)]-Catalyzed Hydrosilylation of Aldehydes and Ketones. *Eur. J. Org. Chem.* **2011**, *2011*, 5291–5296. <https://doi.org/10.1002/ejoc.201100717>
18. Pouchert, C. J.; Behnke, J. The Aldrich Library of <sup>13</sup>C and <sup>1</sup>H FT NMR Spectra, 1st ed., Vol.2 ; Aldrich Chemical Company Inc.: St. Louis, MI, USA, 1993, 357B.
19. Bhattacharya, P.; Krause, J.A.; Guan, H. Iron Hydride Complexes Bearing Phosphinite-Based Pincer Ligands: Synthesis, Reactivity, and Catalytic Application in Hydrosilylation Reactions. *Organometallics* **2011**, *30*, 4720–4729. <https://doi.org/10.1021/om2005589>
20. Xu, G.; Moeller, K.D. Anodic Coupling Reactions and the Synthesis of C-Glycosides. *Org. Lett.* **2010**, *12*, 2590–2593. <https://doi.org/10.1021/ol100800u>

6a

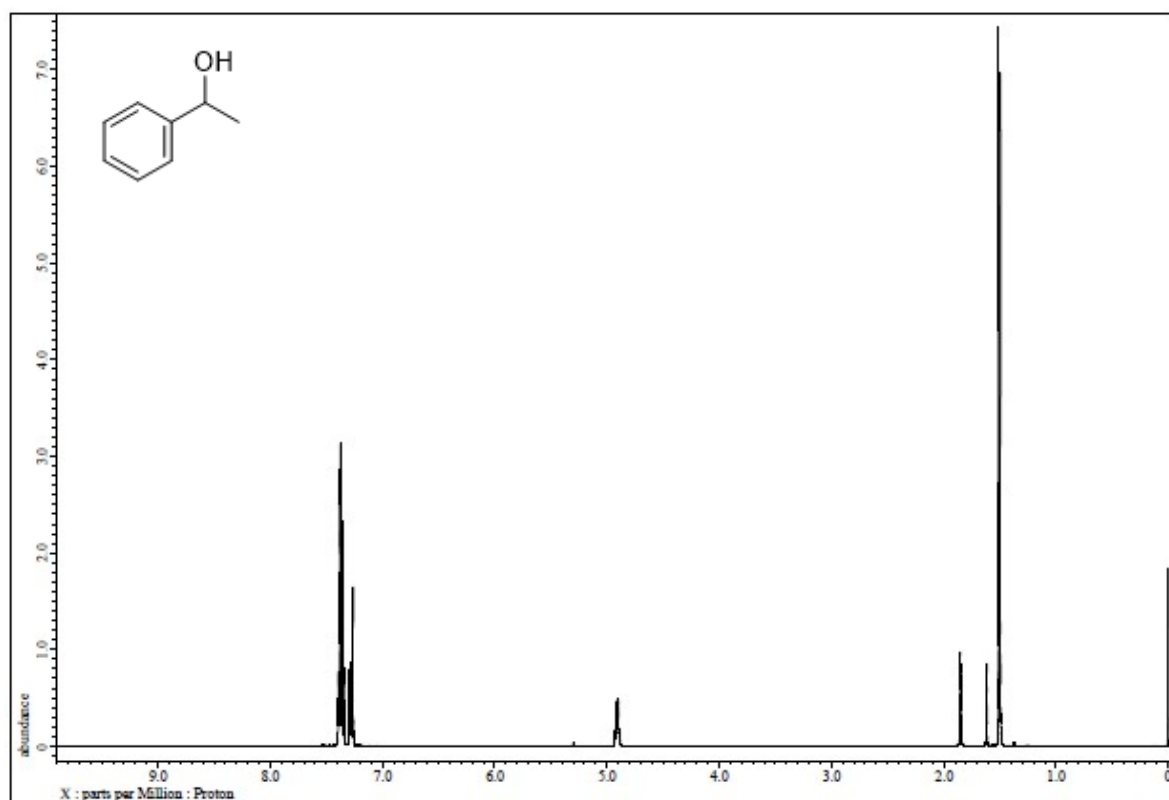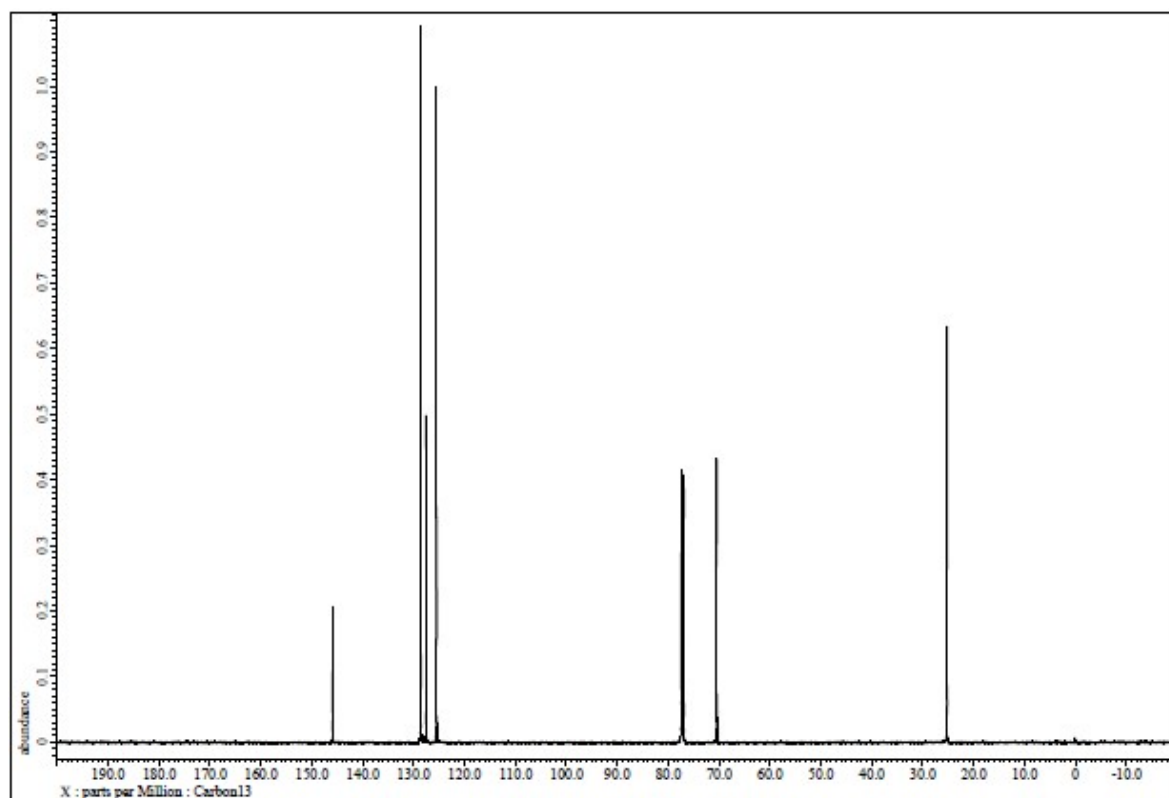

6b

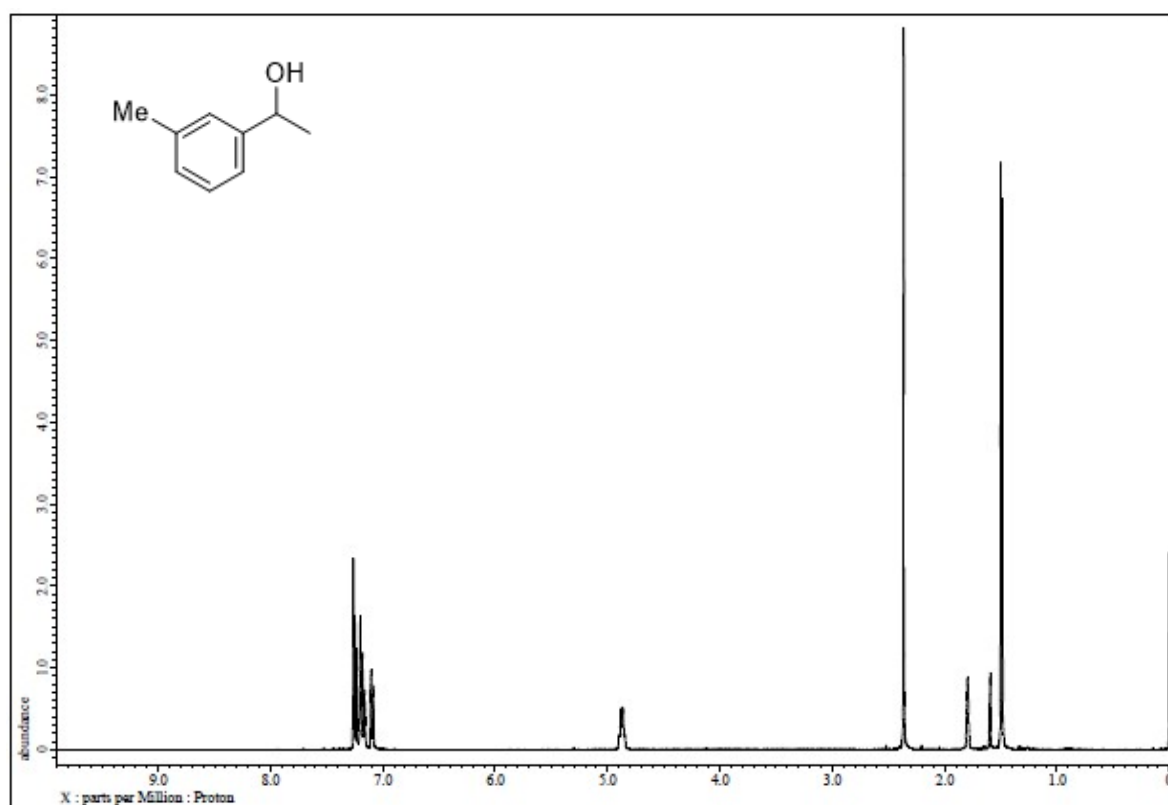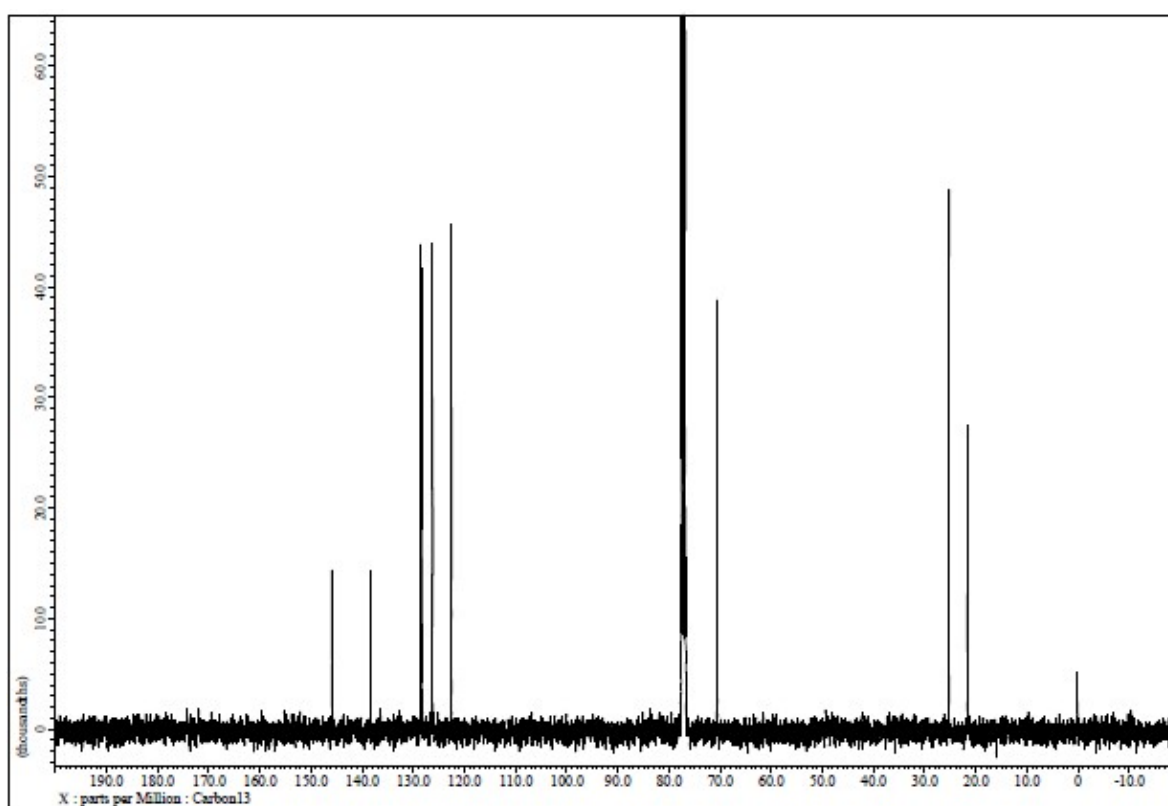



6c

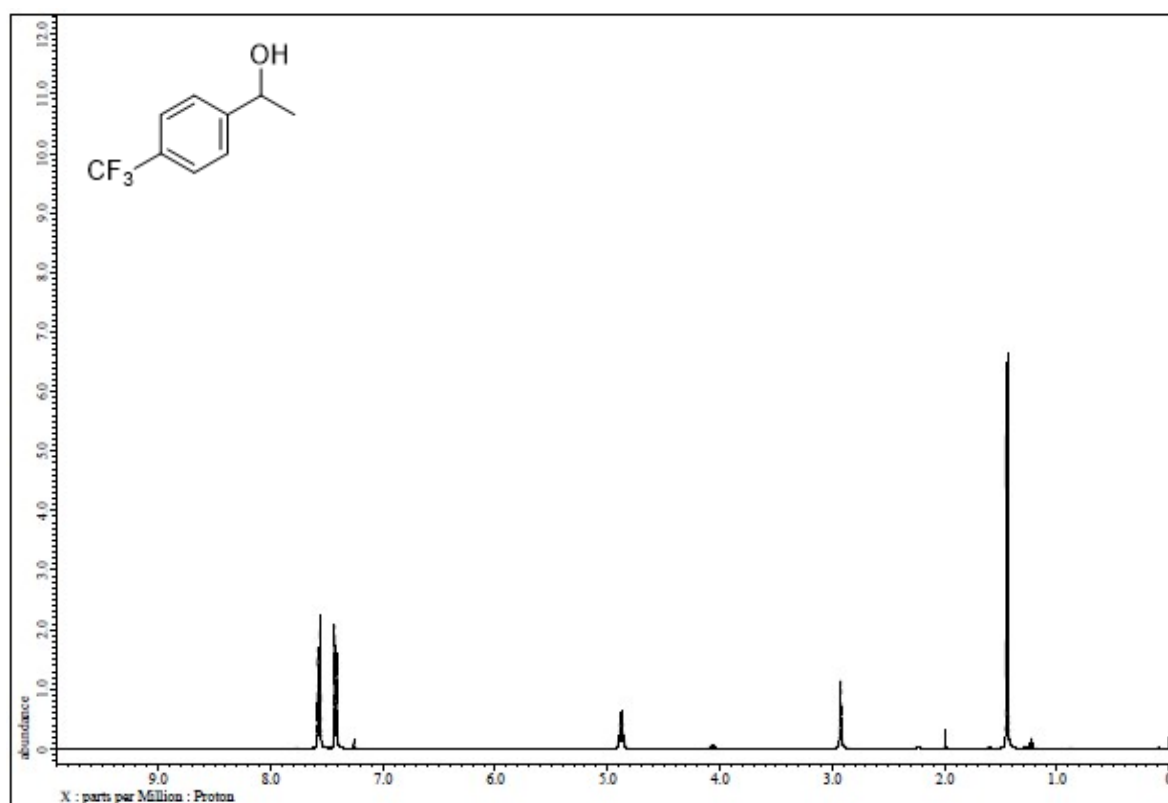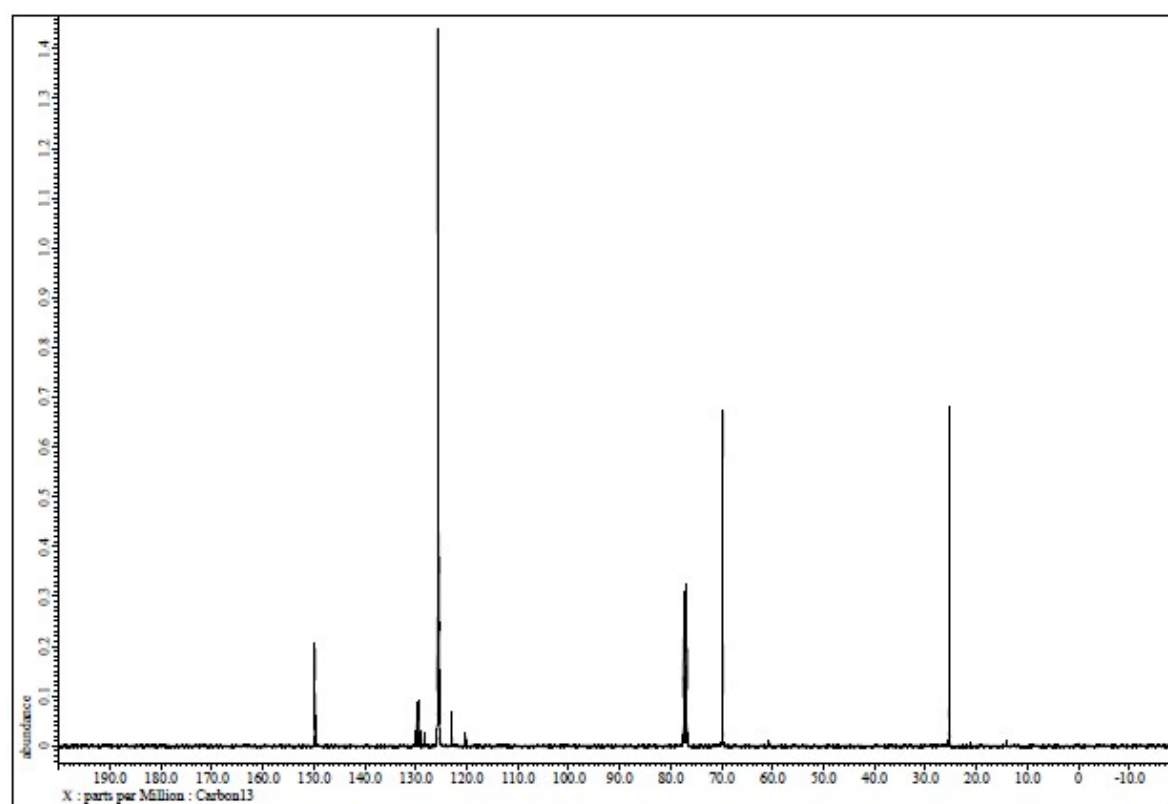

6d

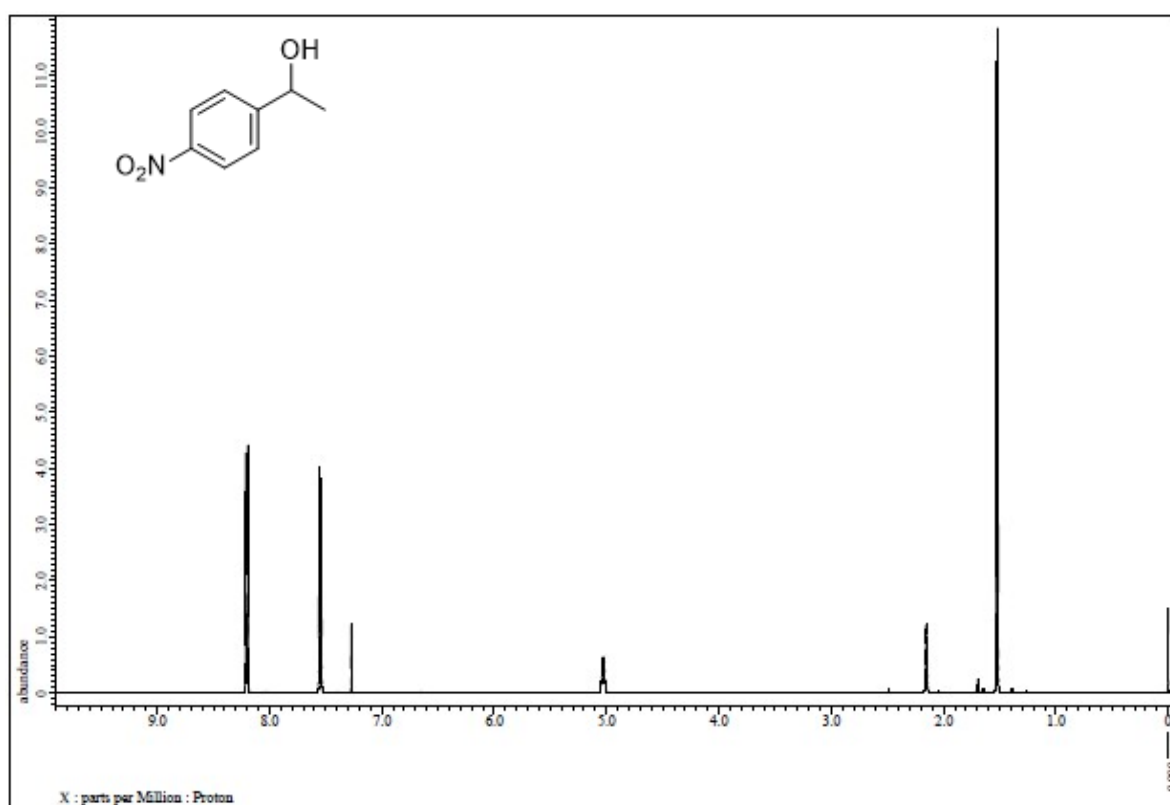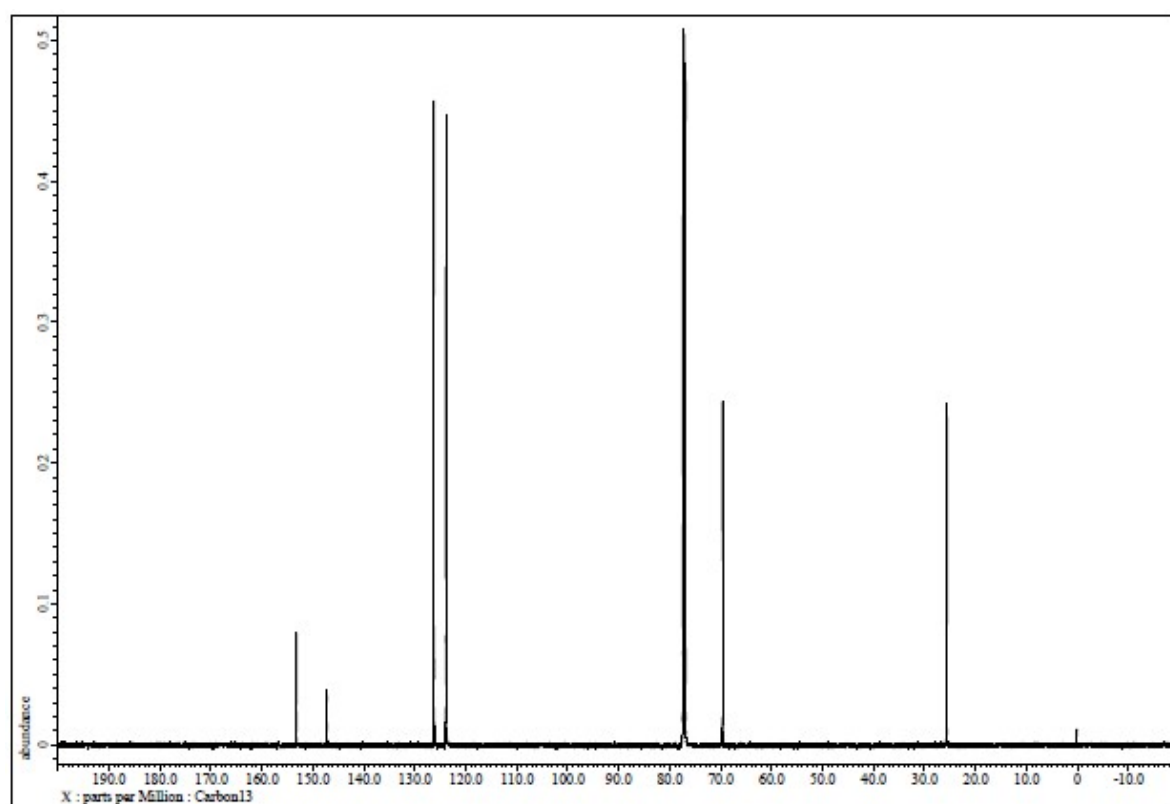

6e

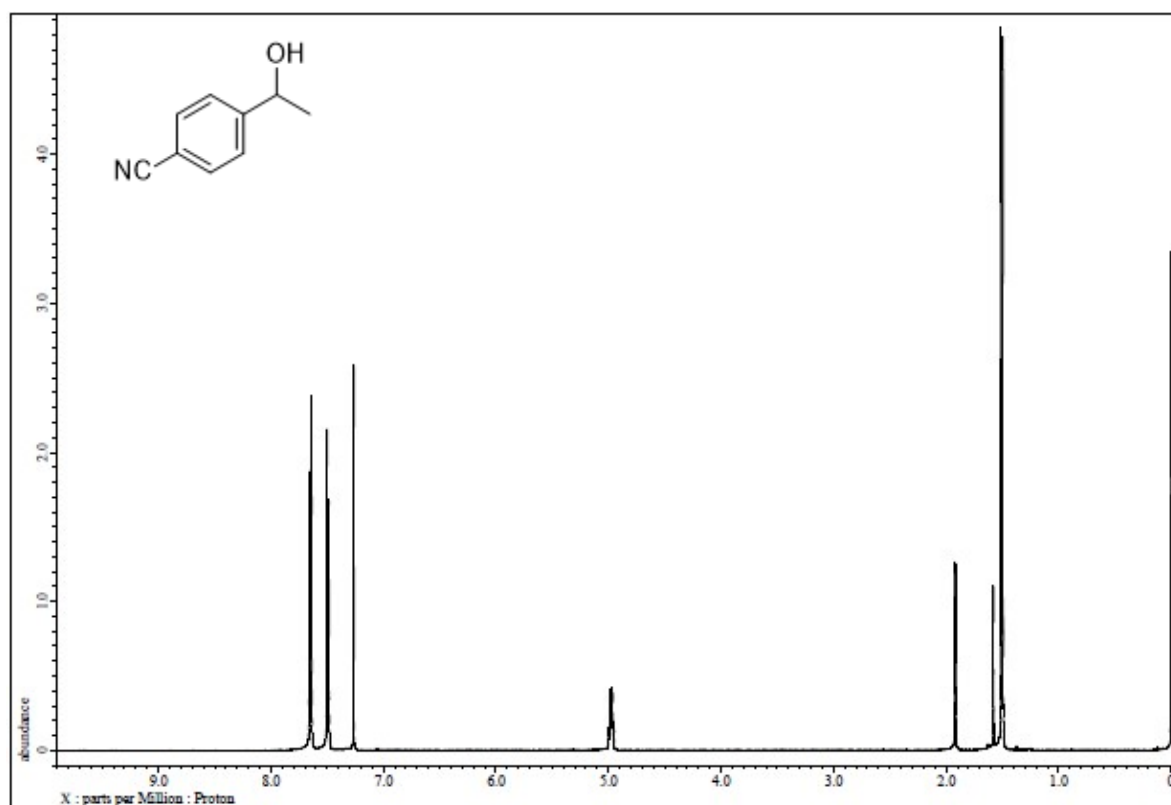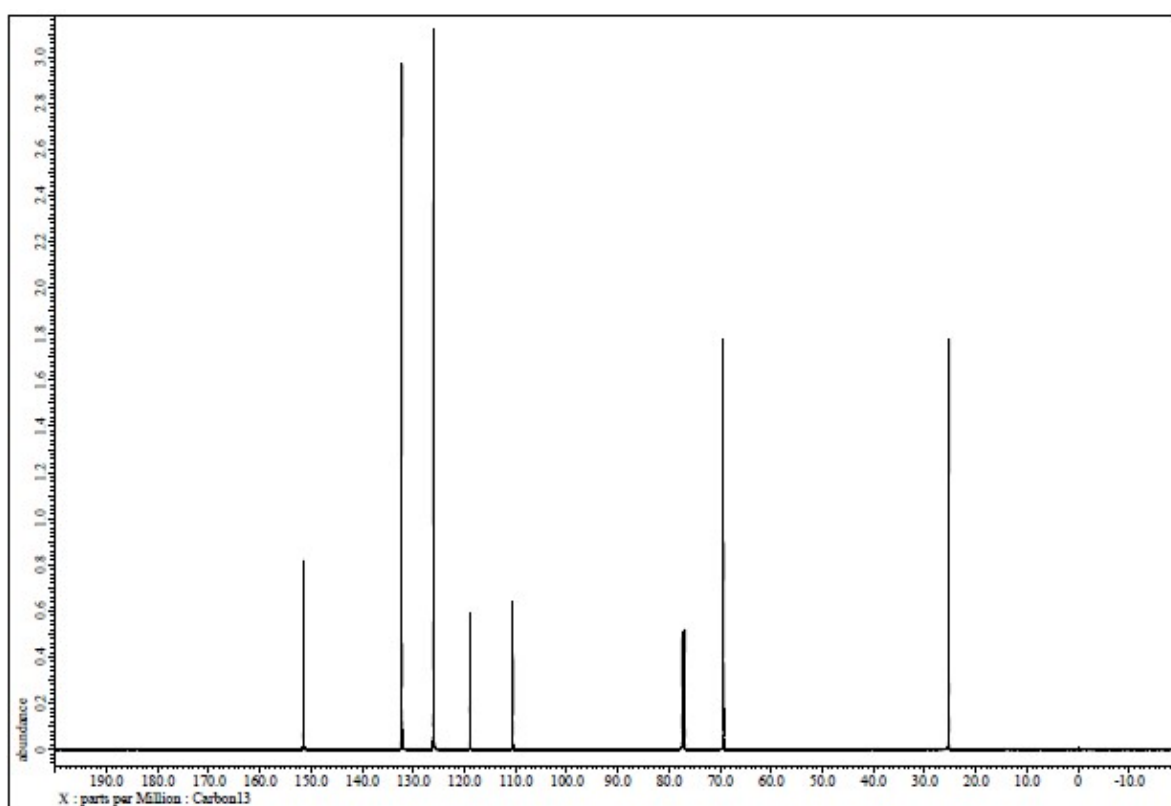

6f

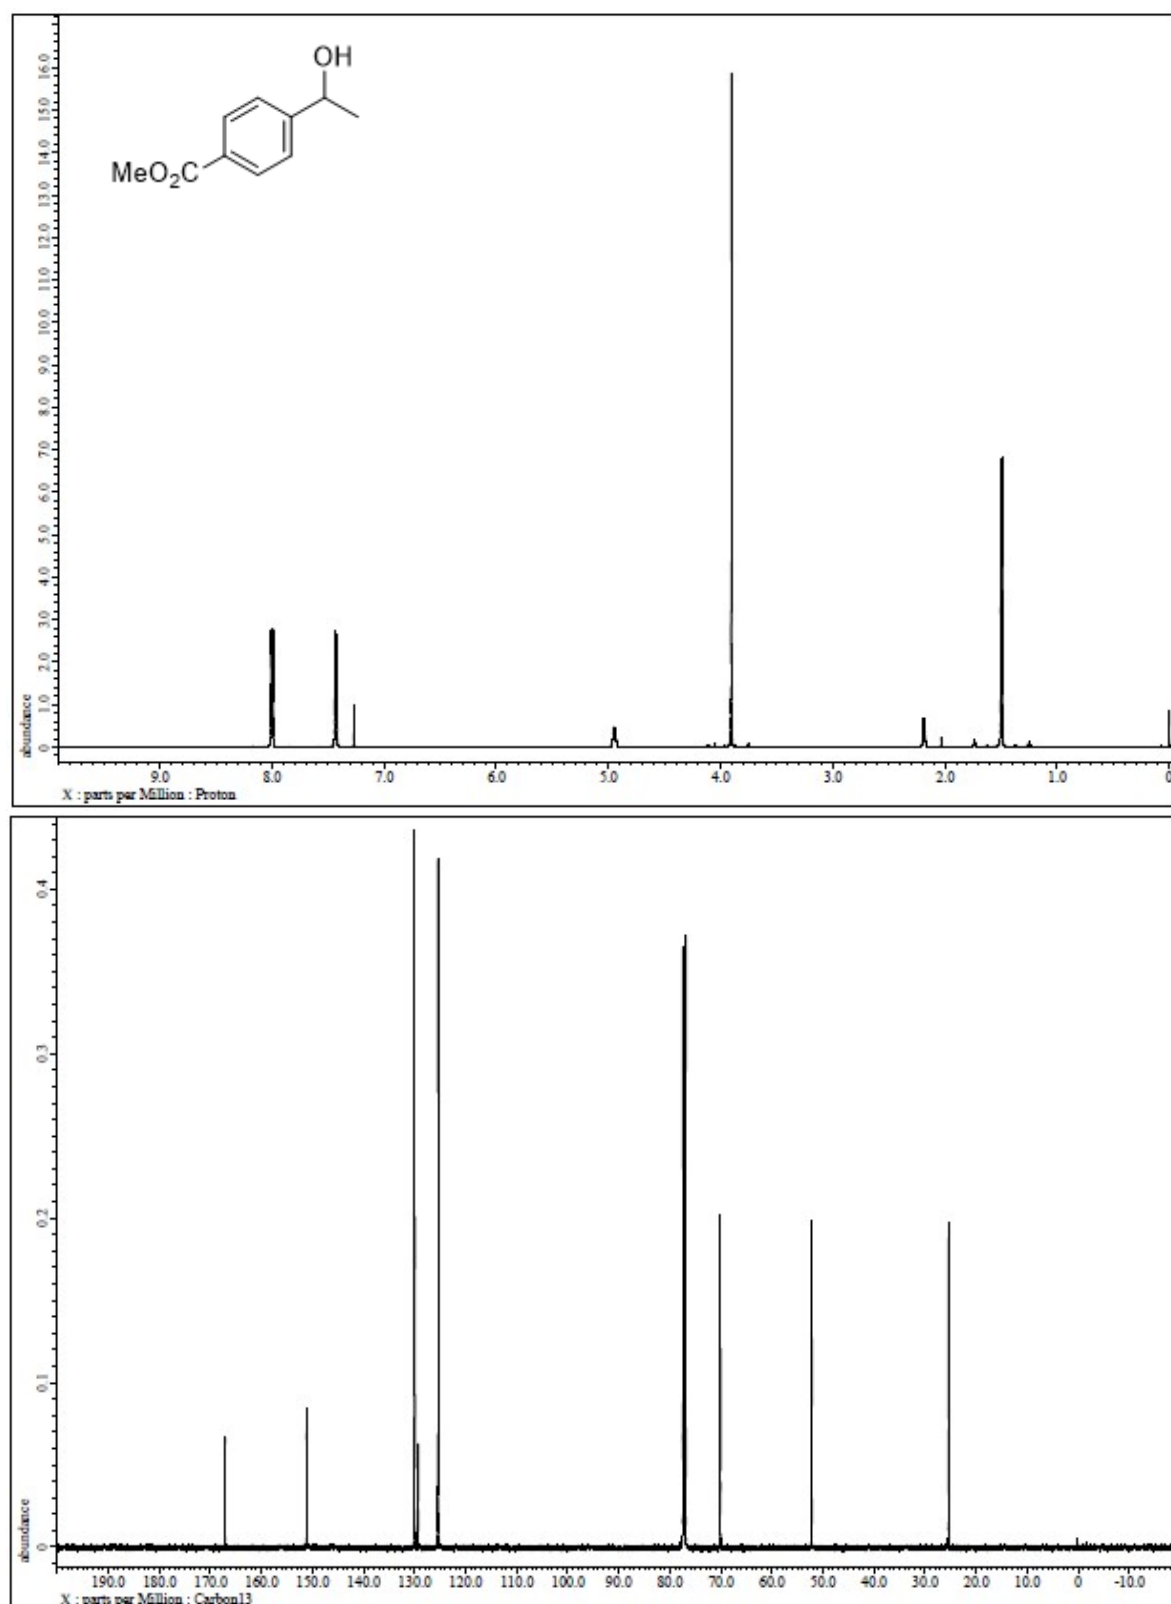

6g

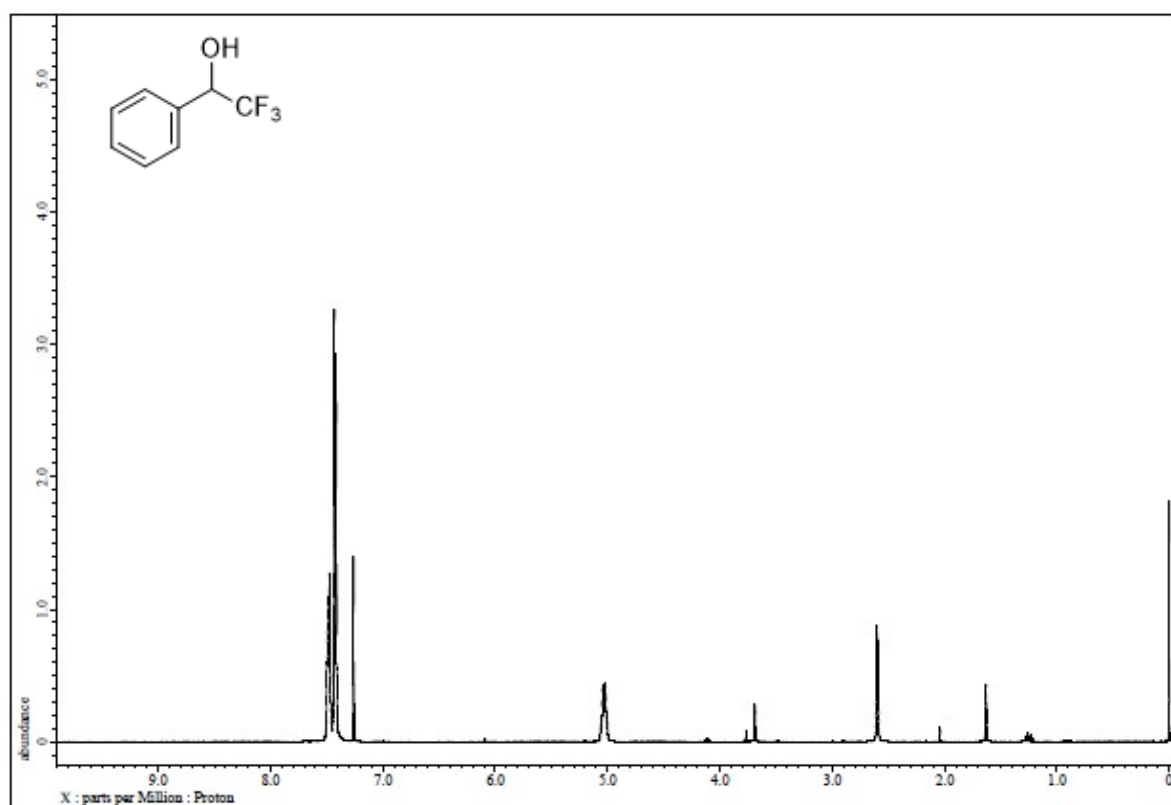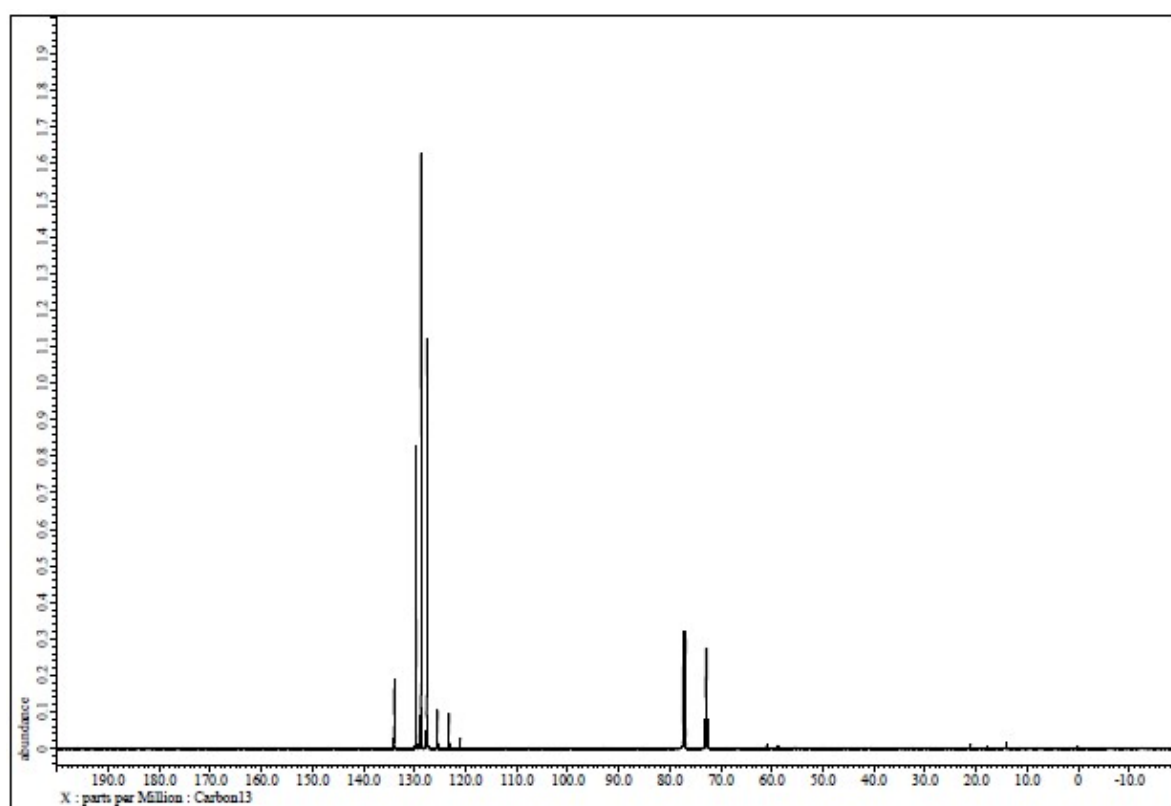

6h

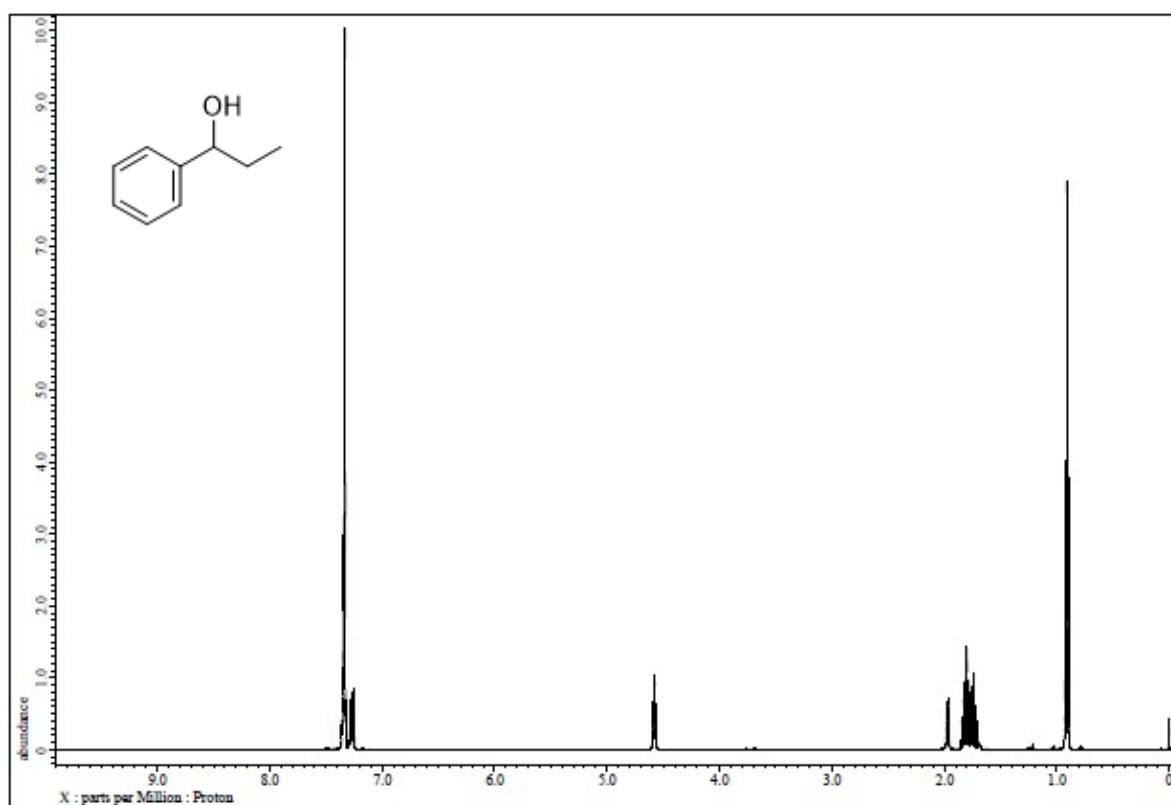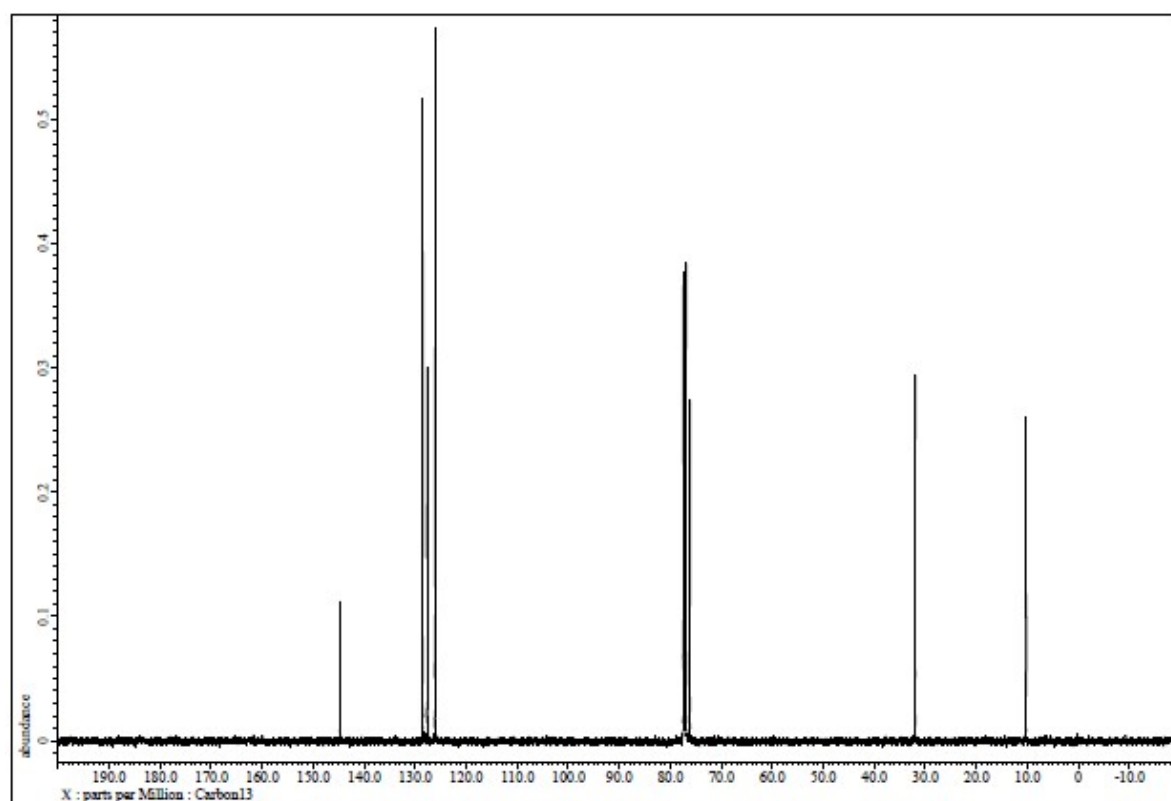

6i

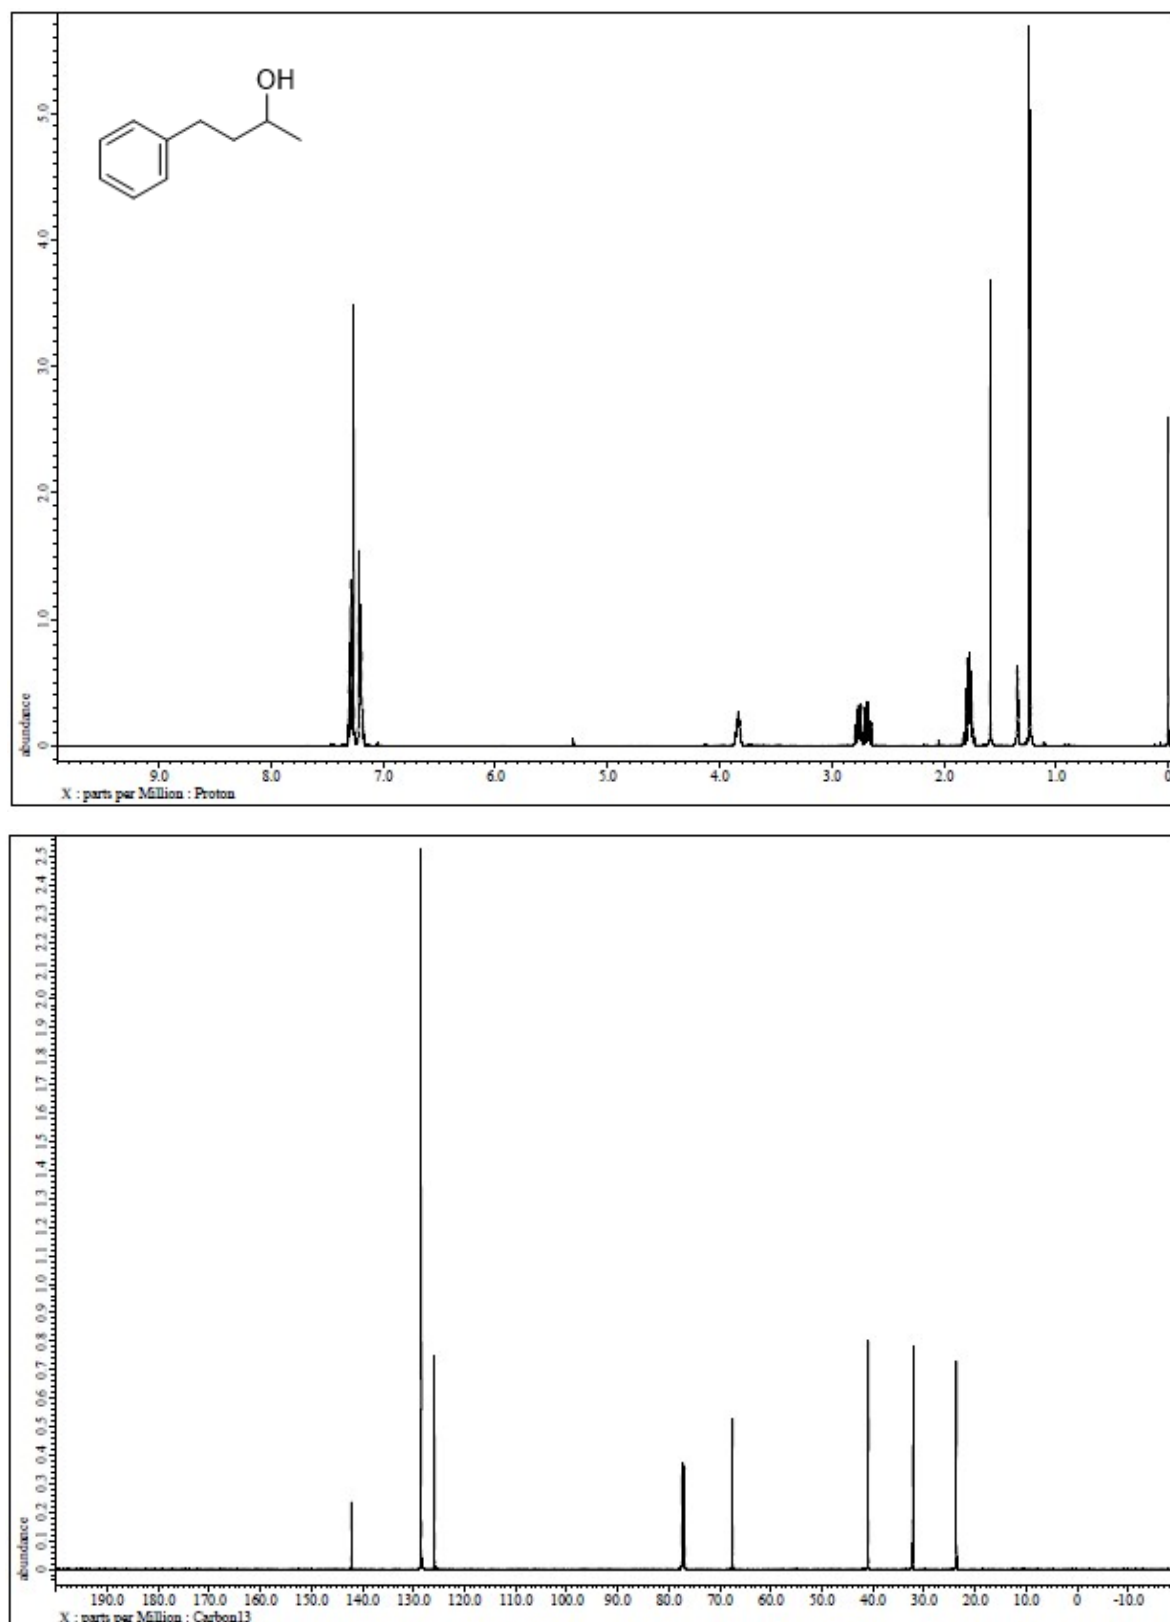

6j

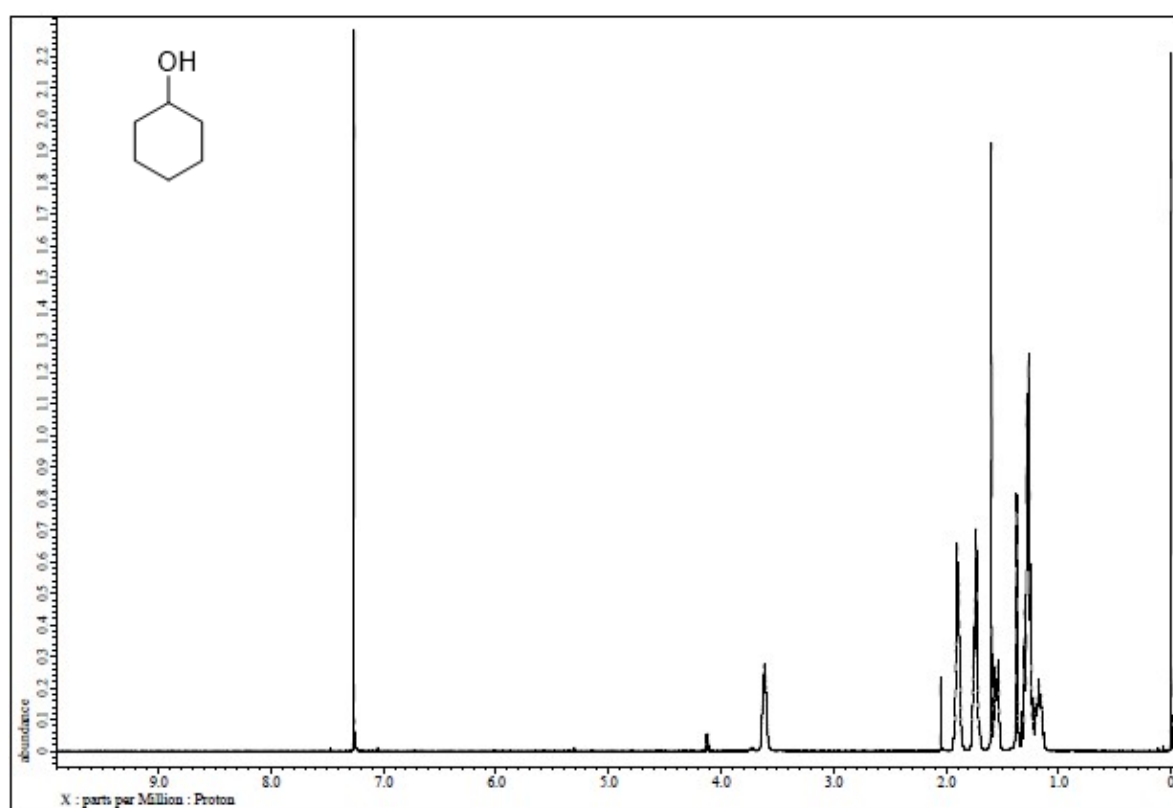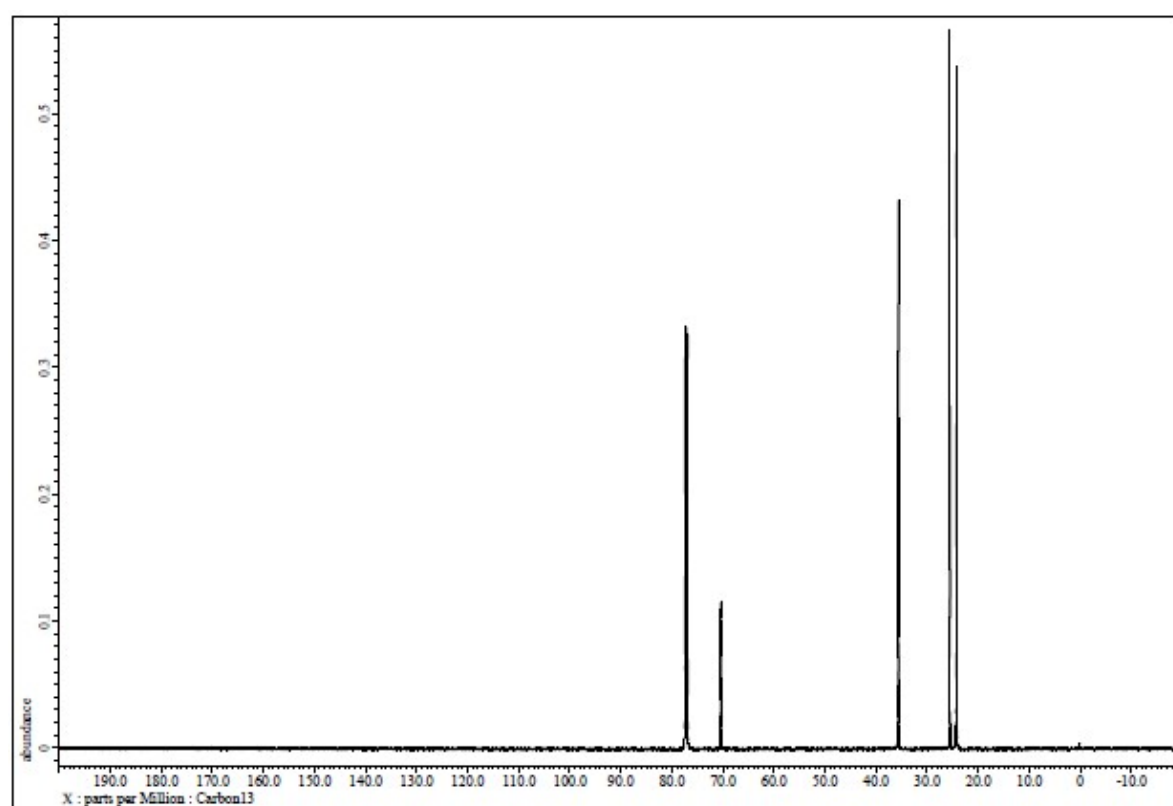



6k

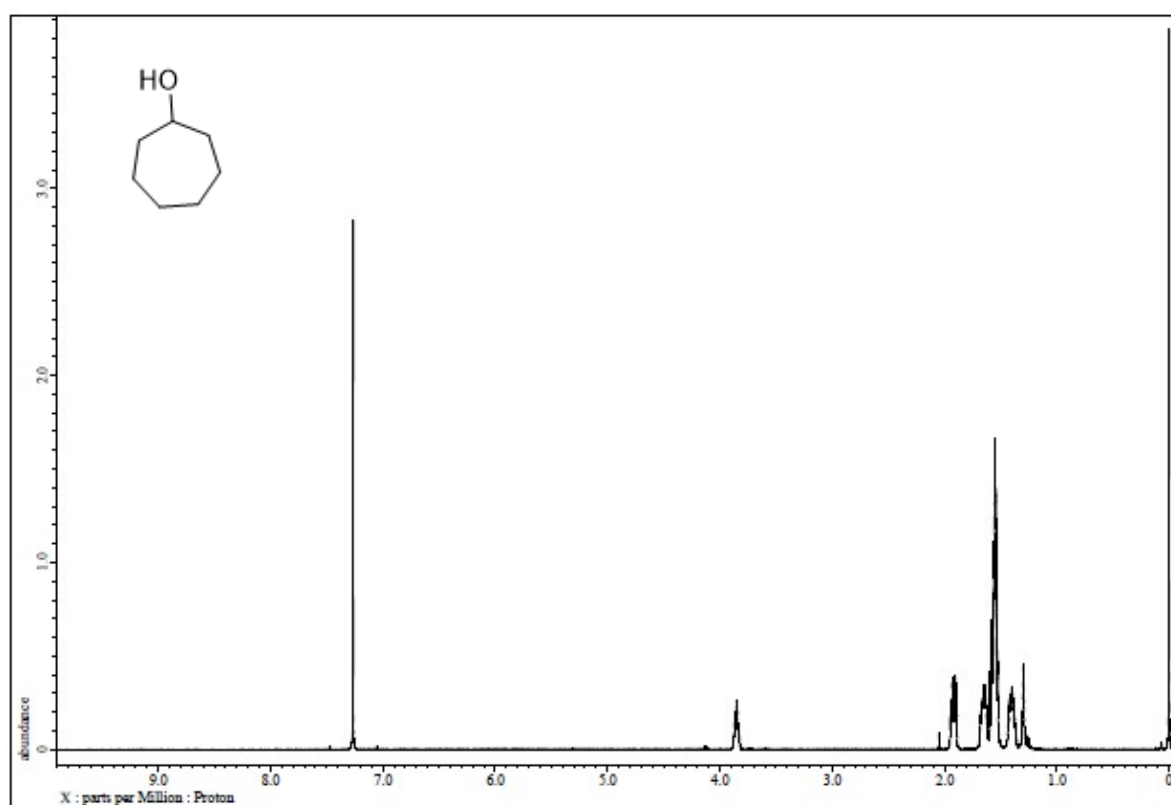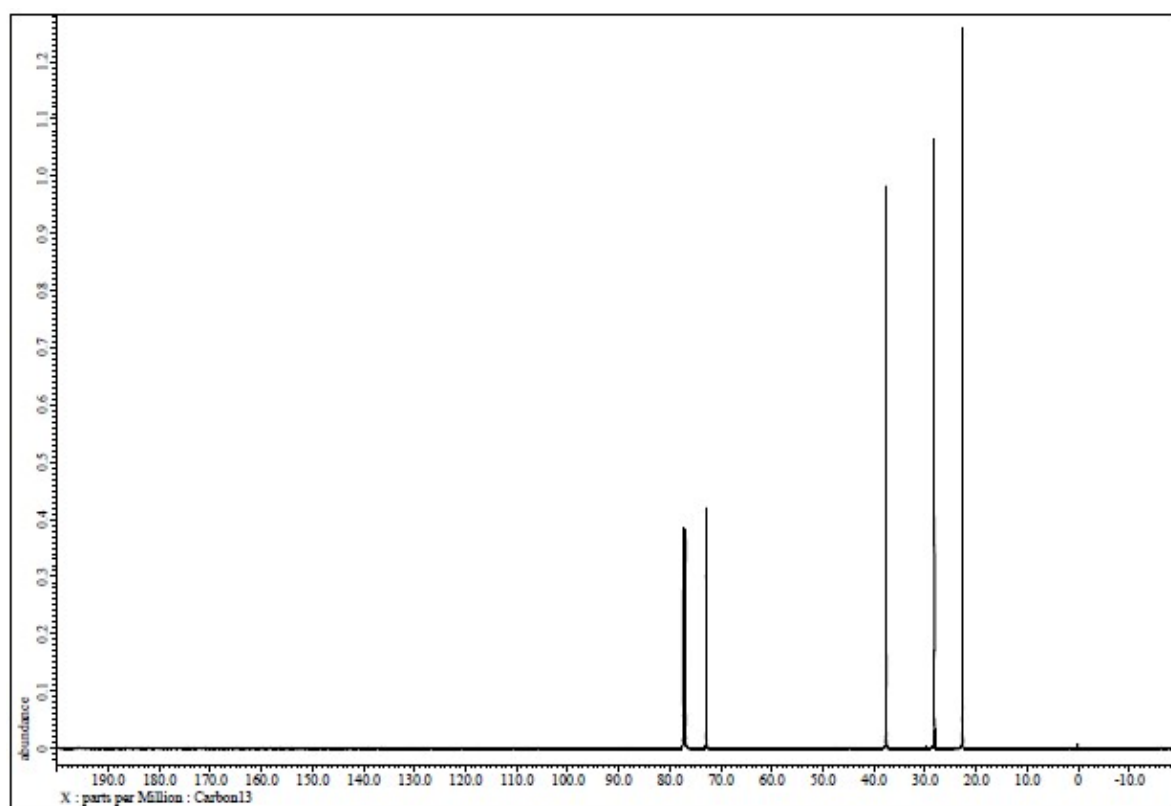

61

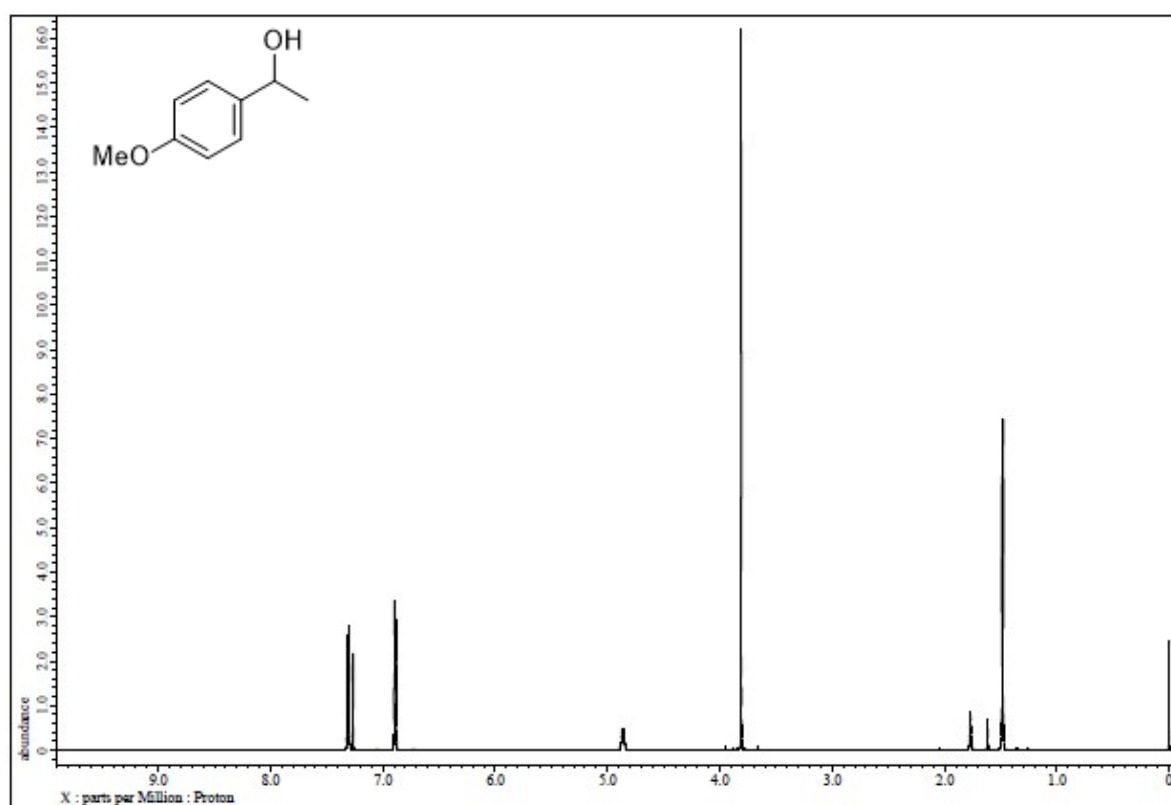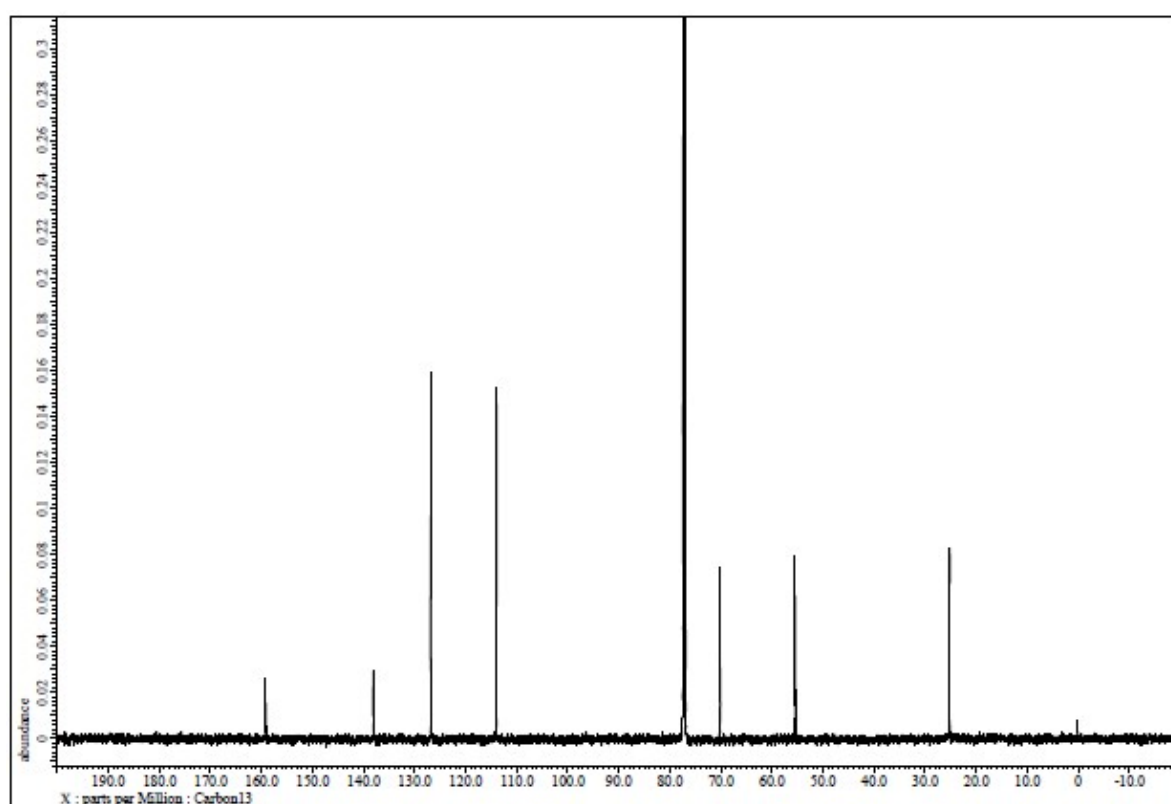

6m

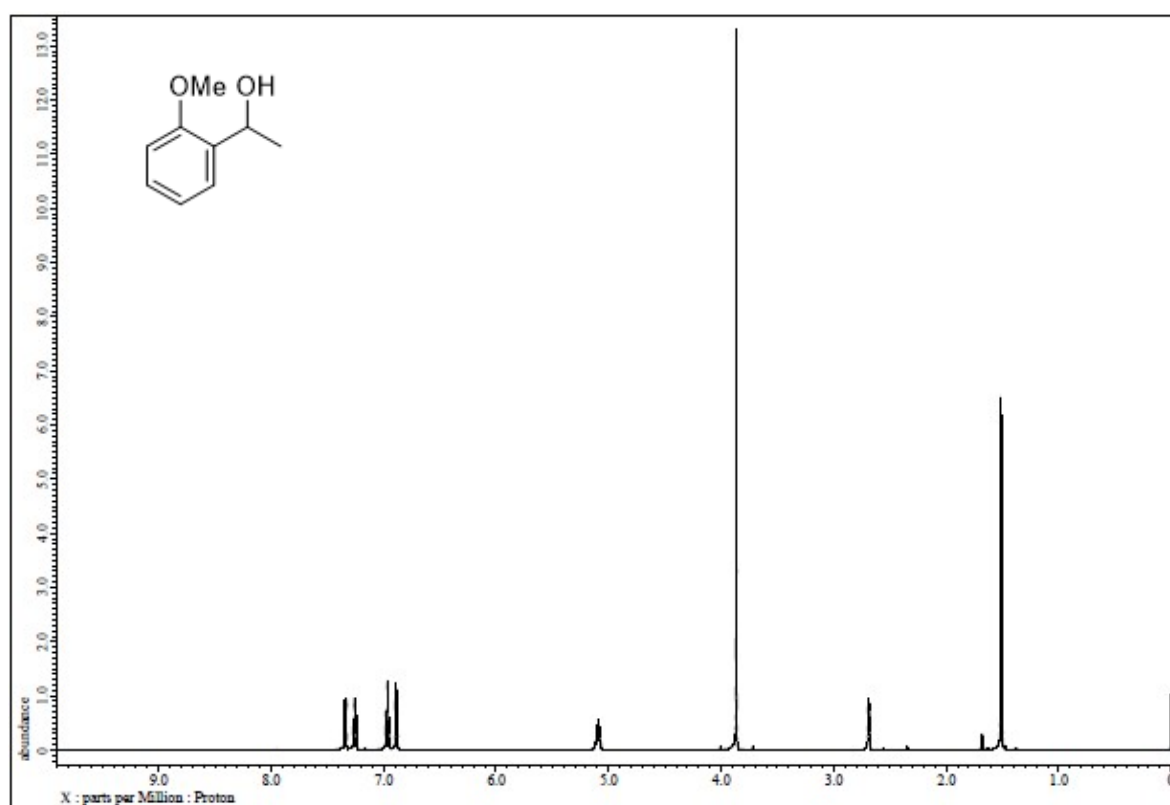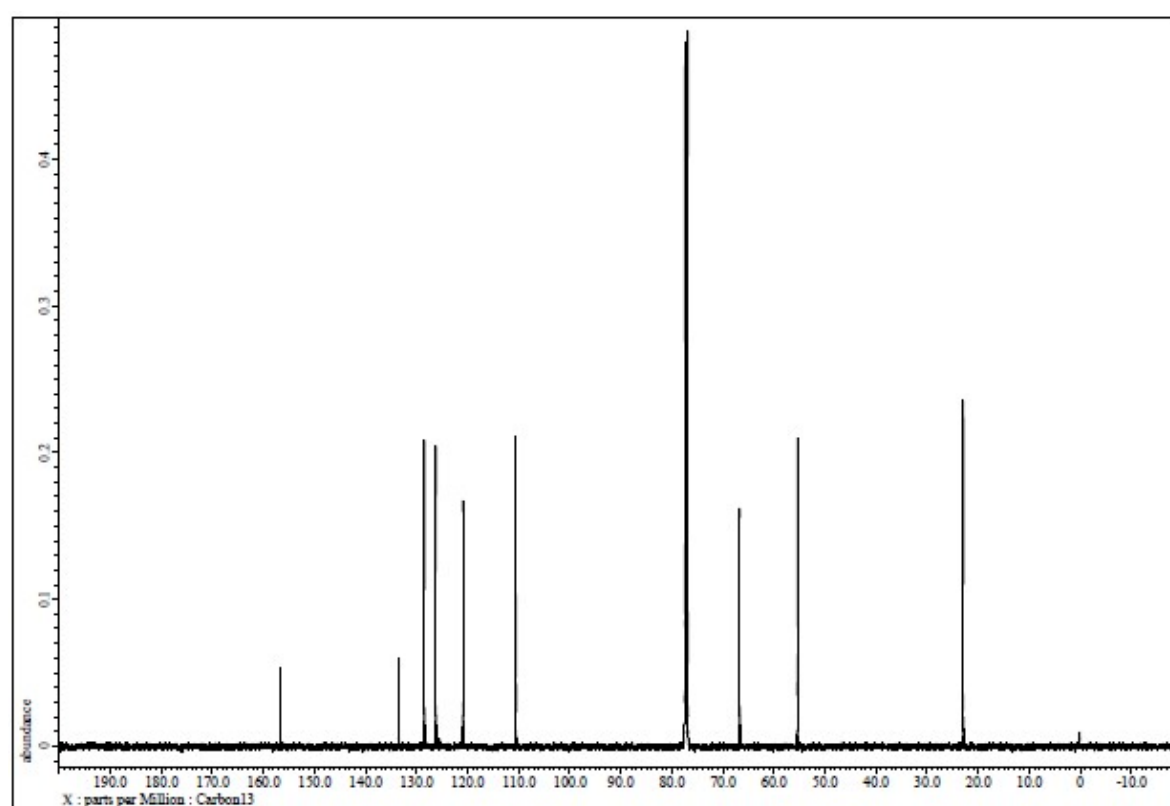

**6n**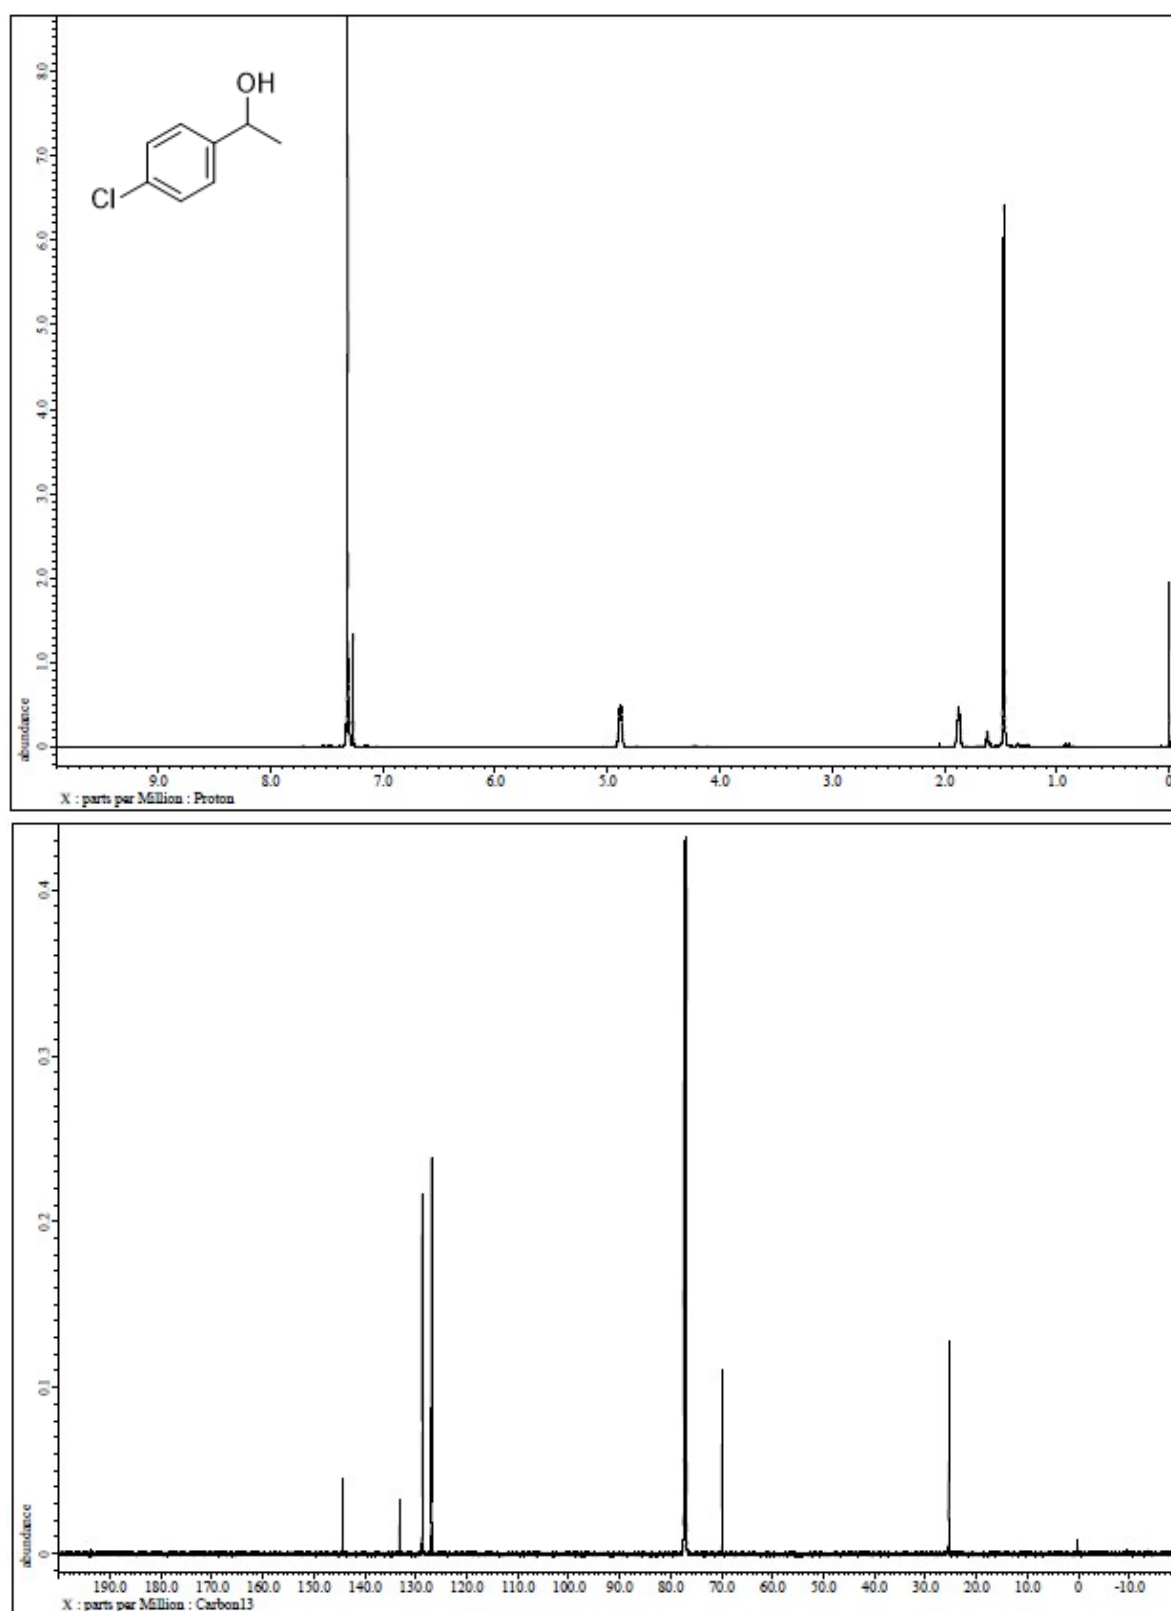

60

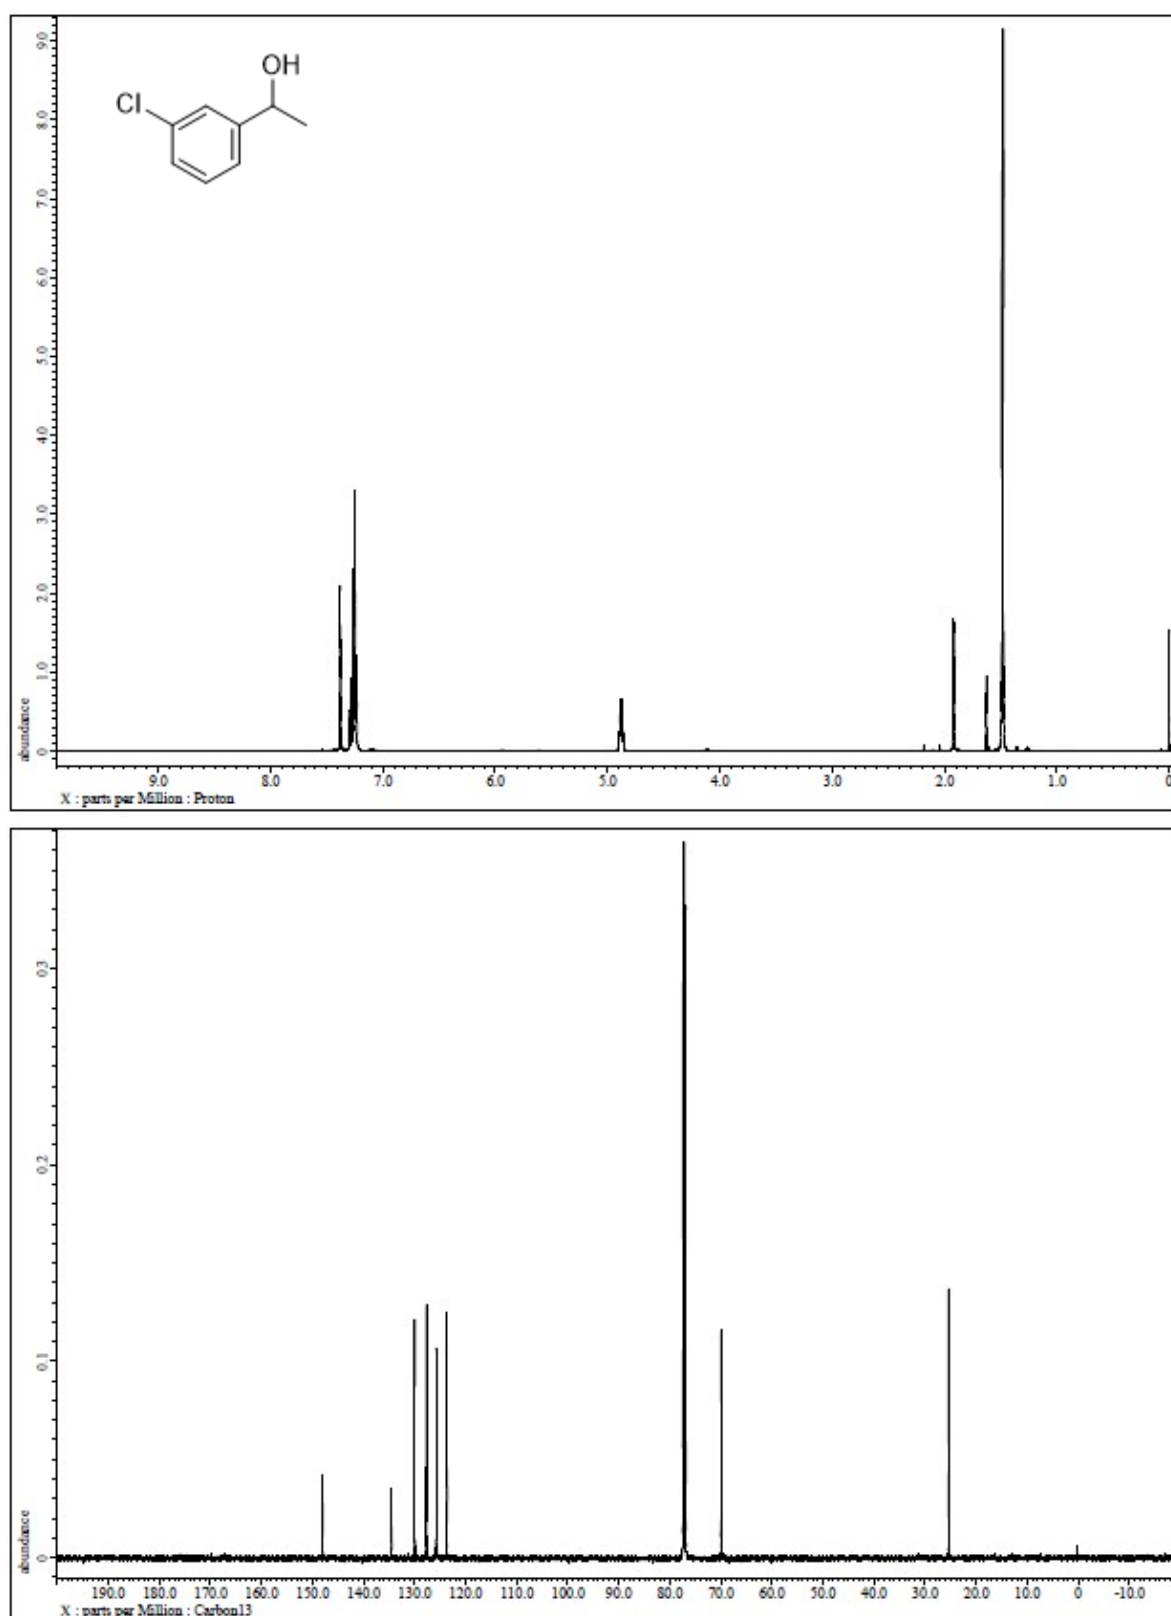

6p

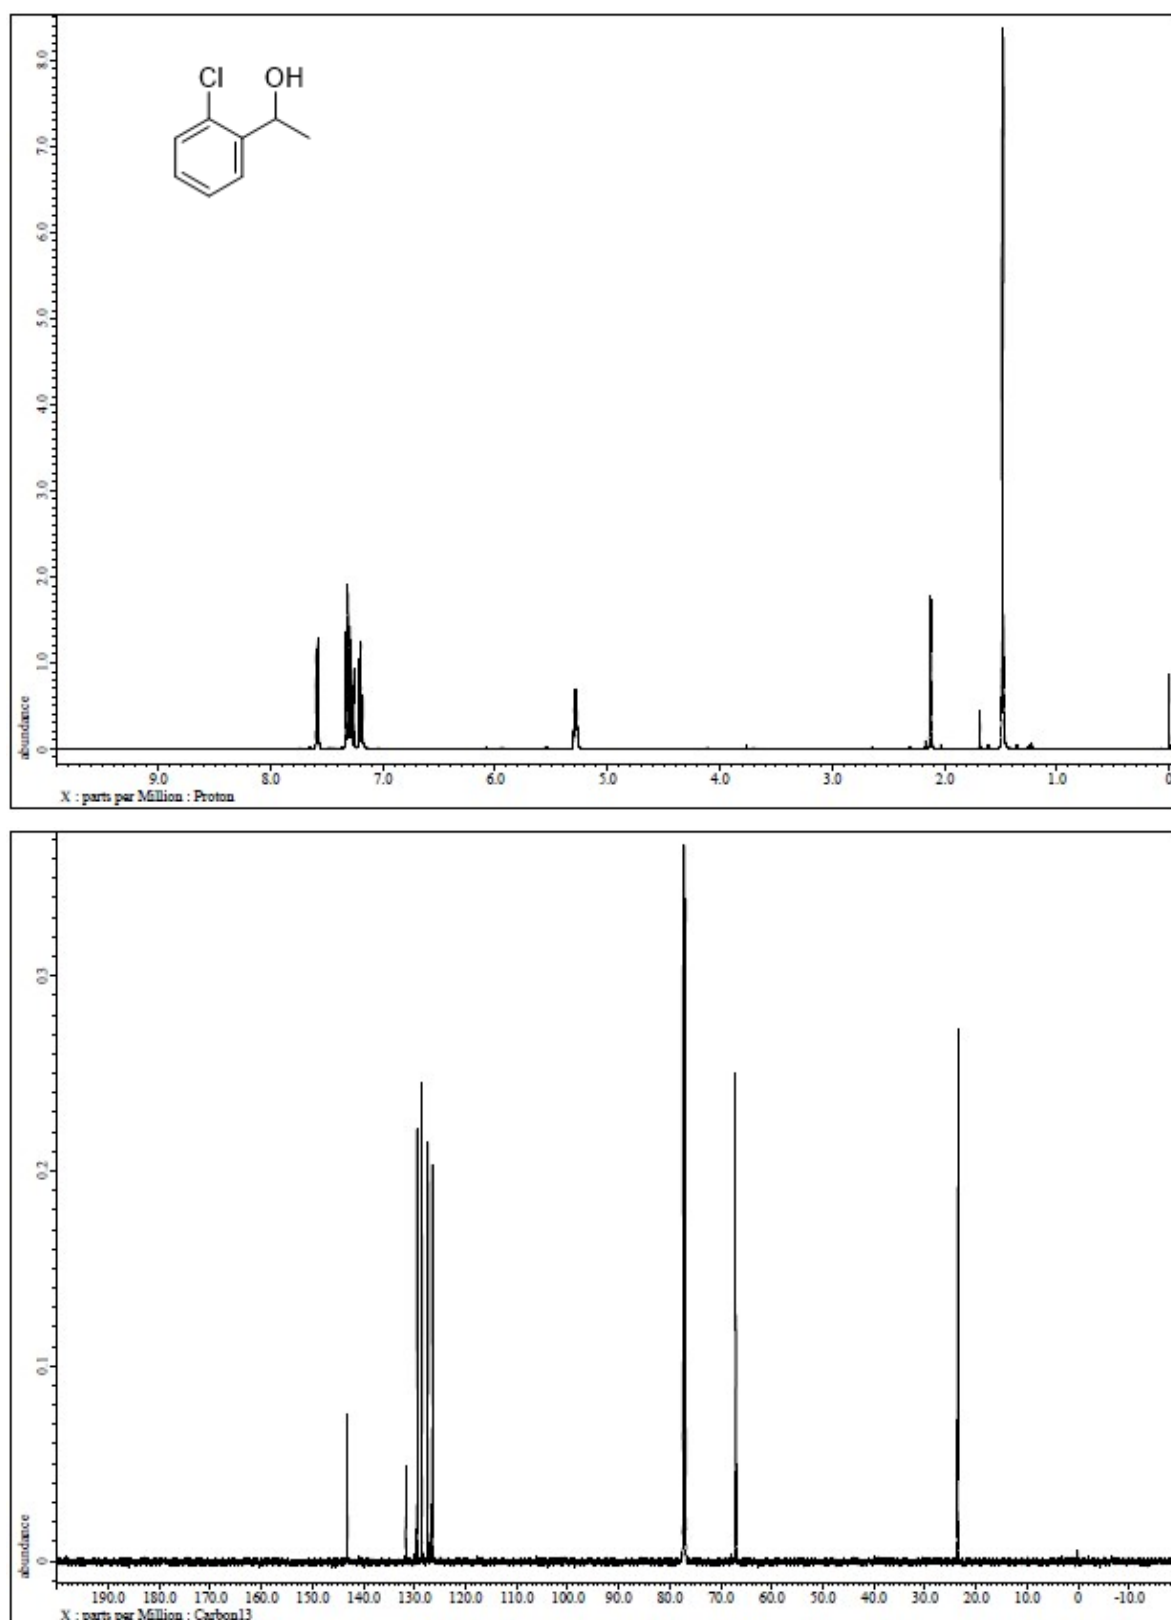

6q

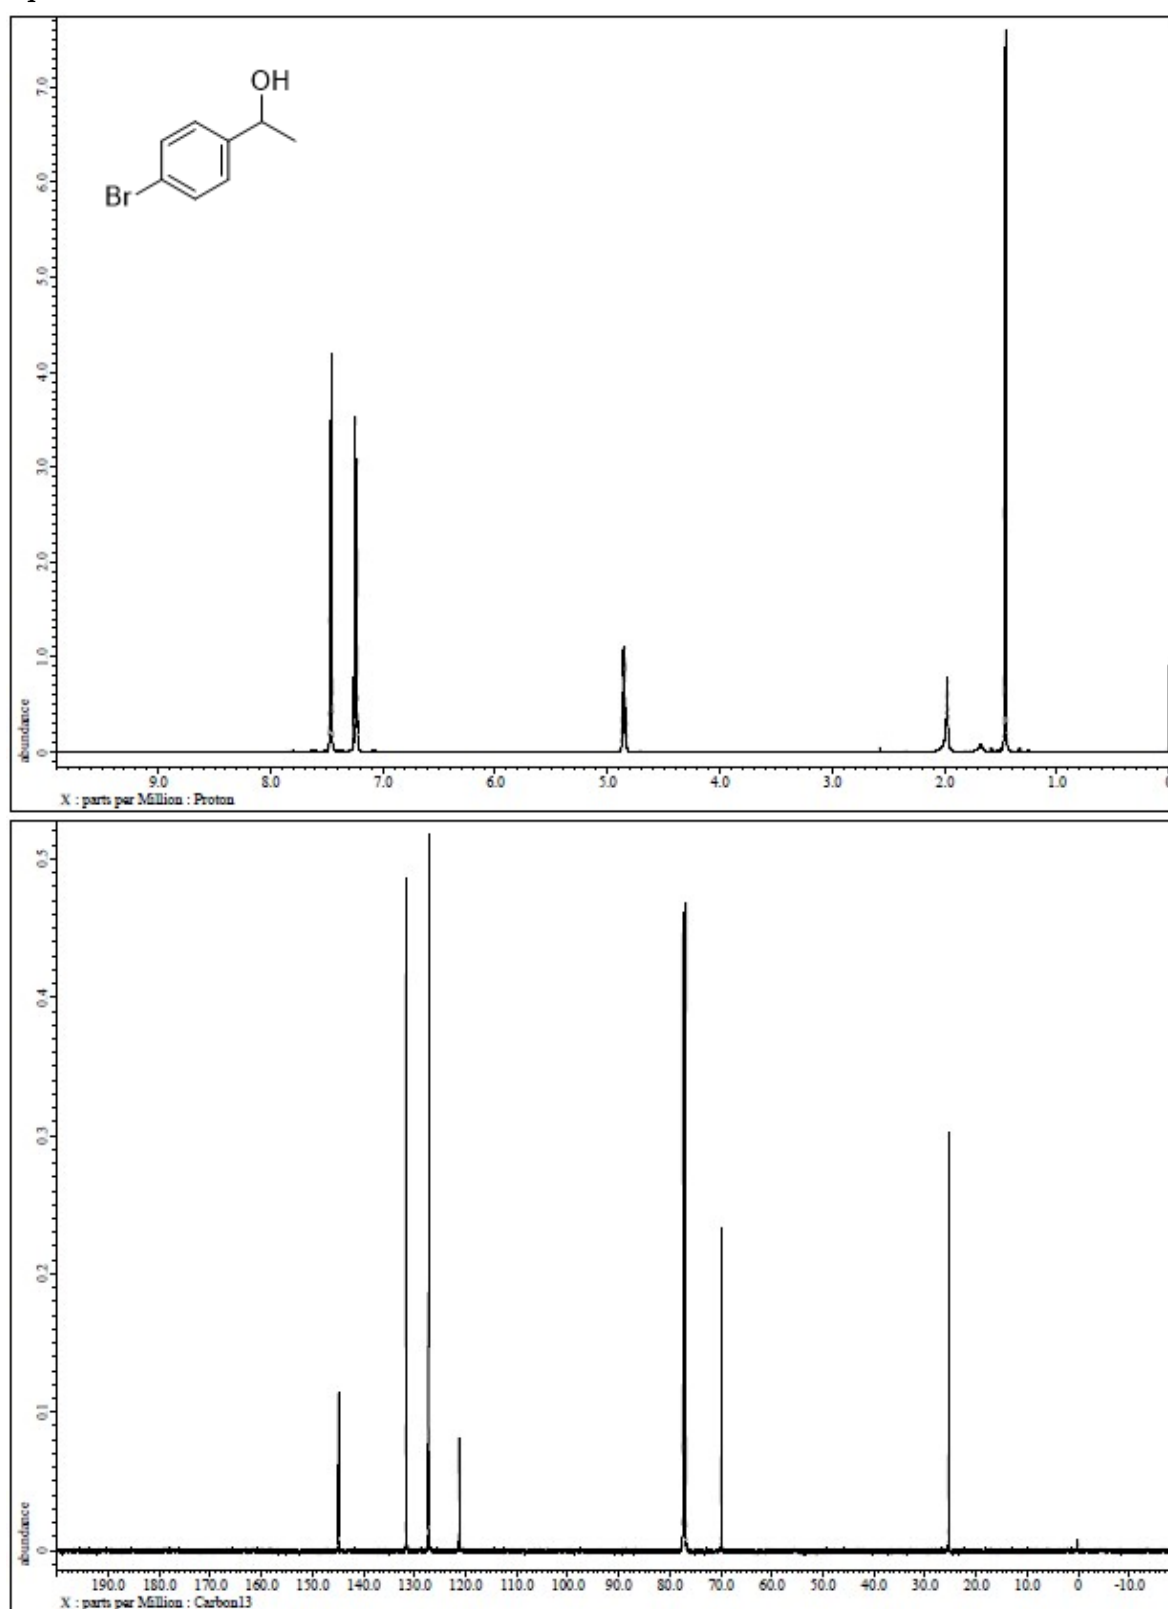

8a

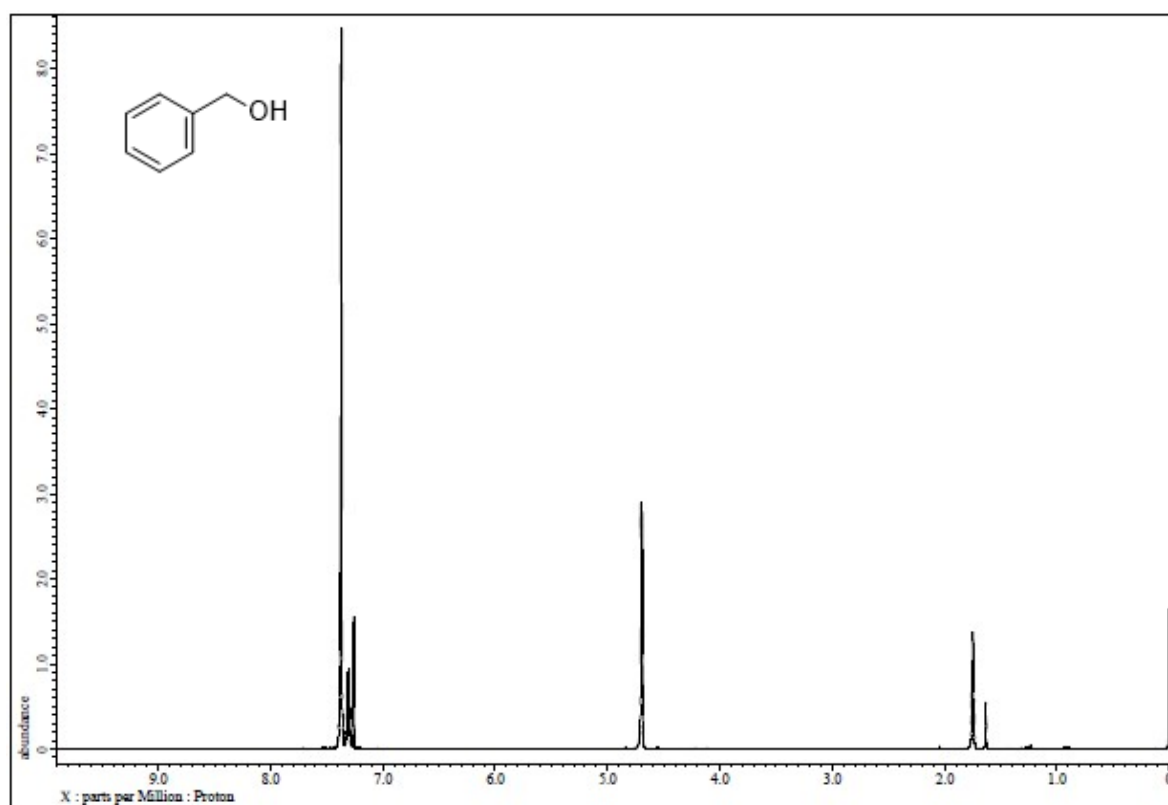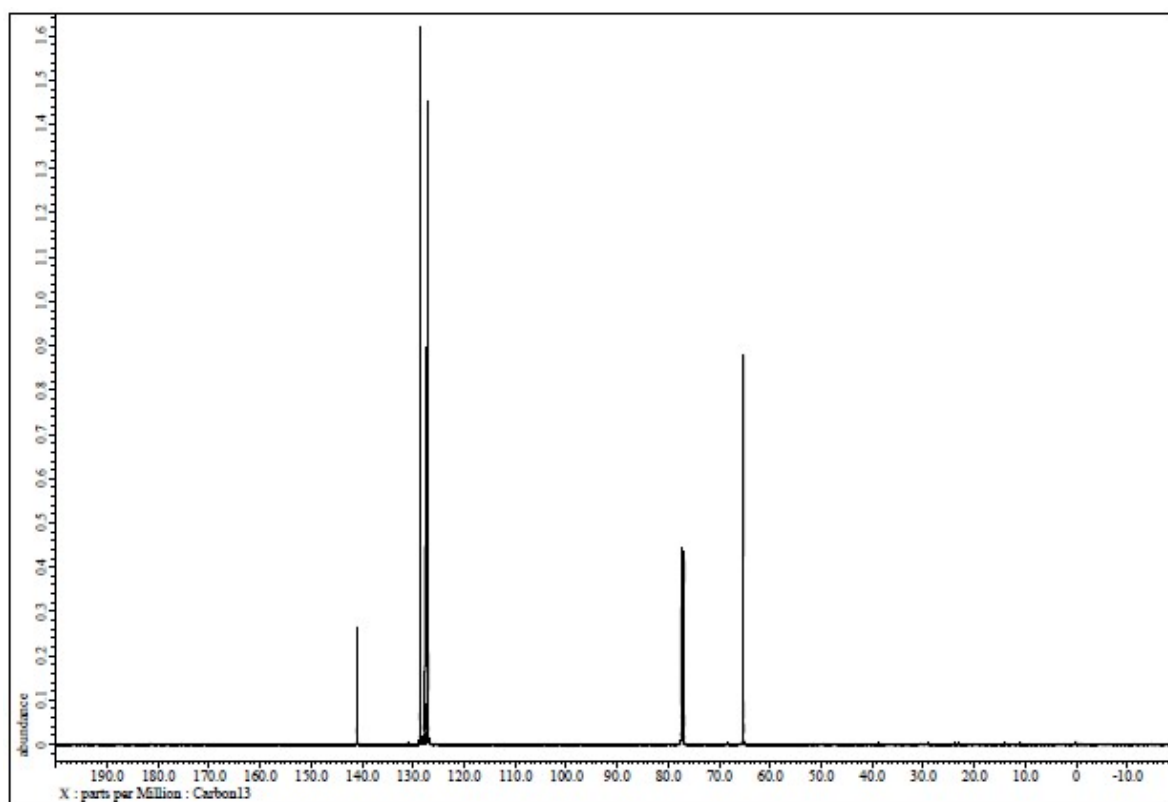



8b

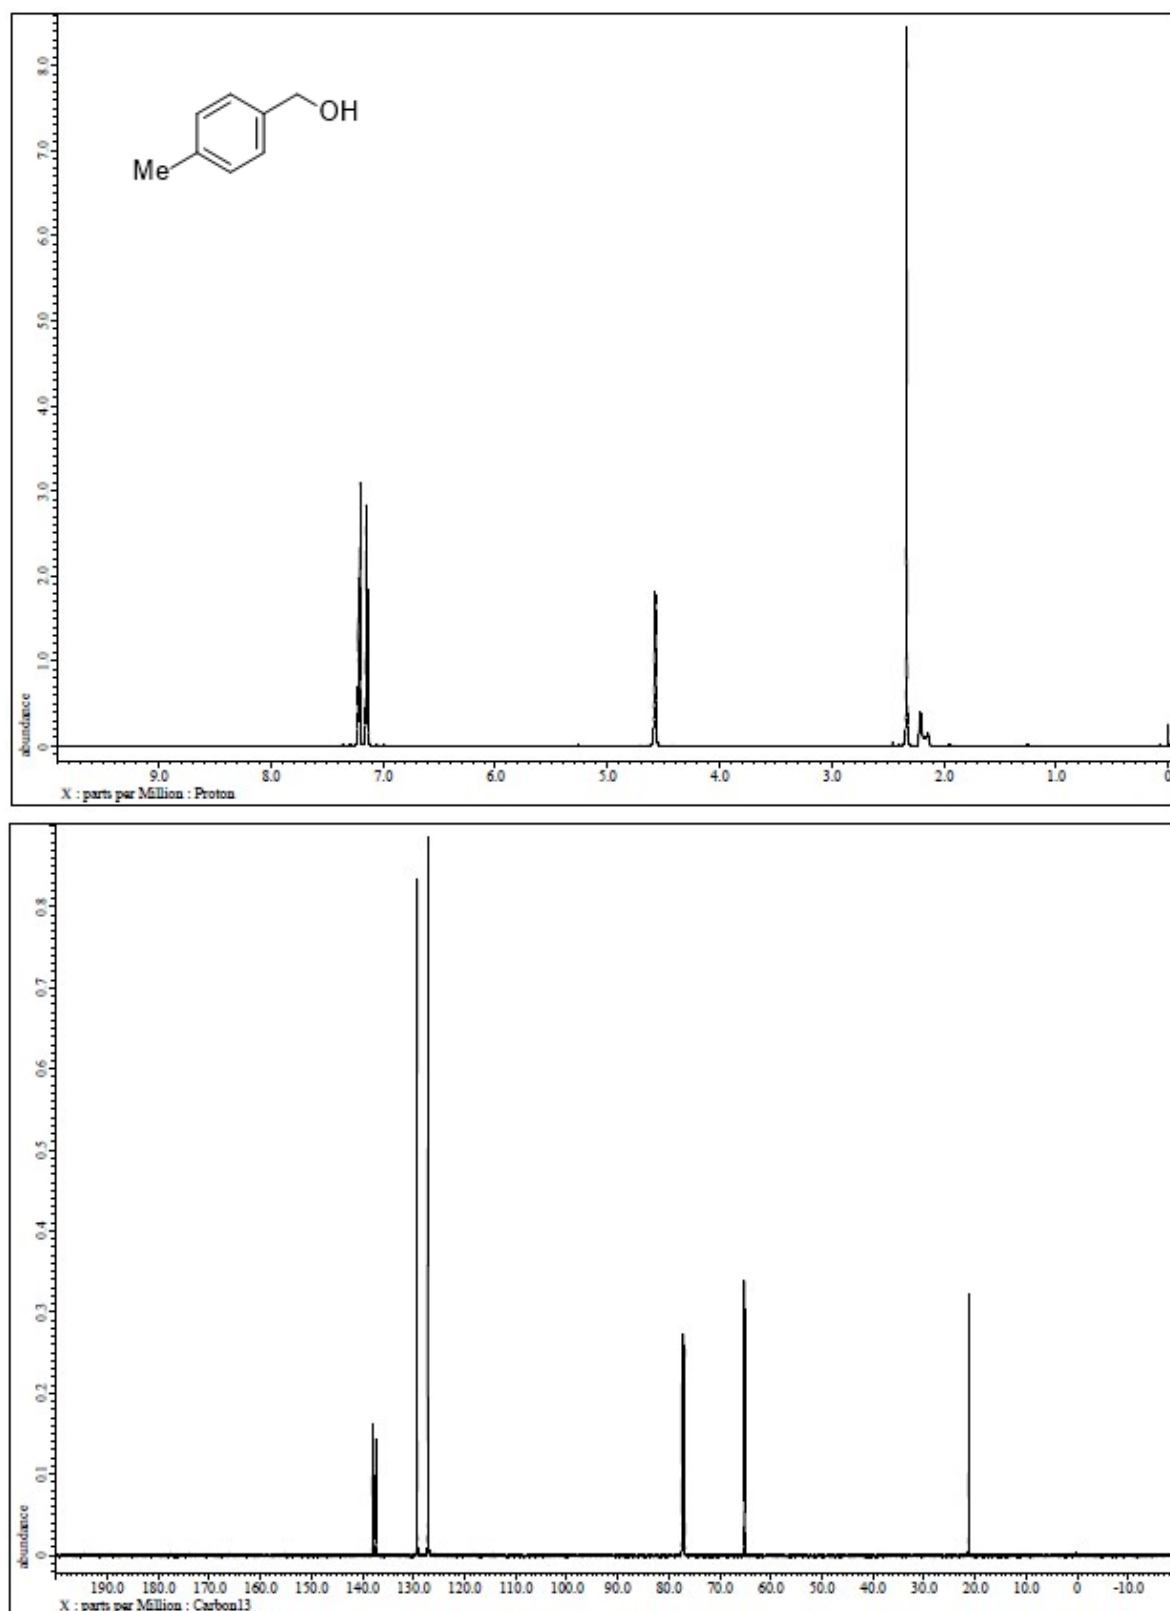

8c

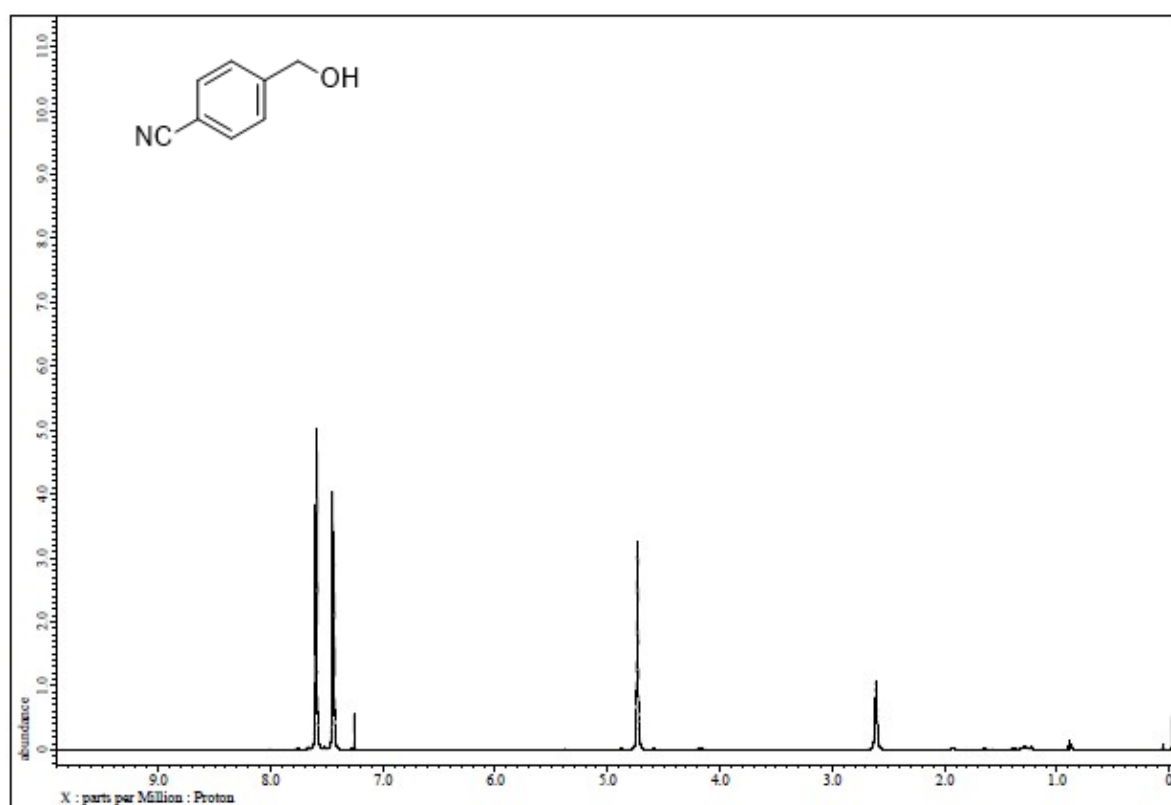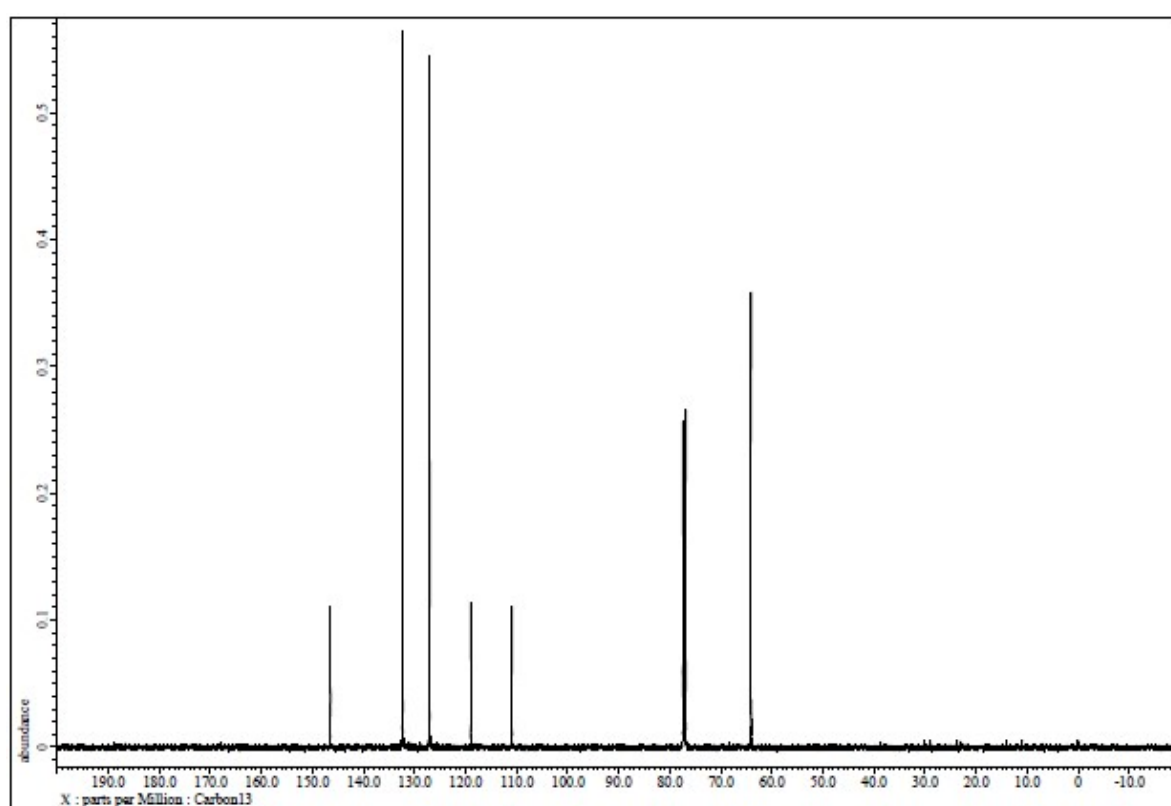

8d

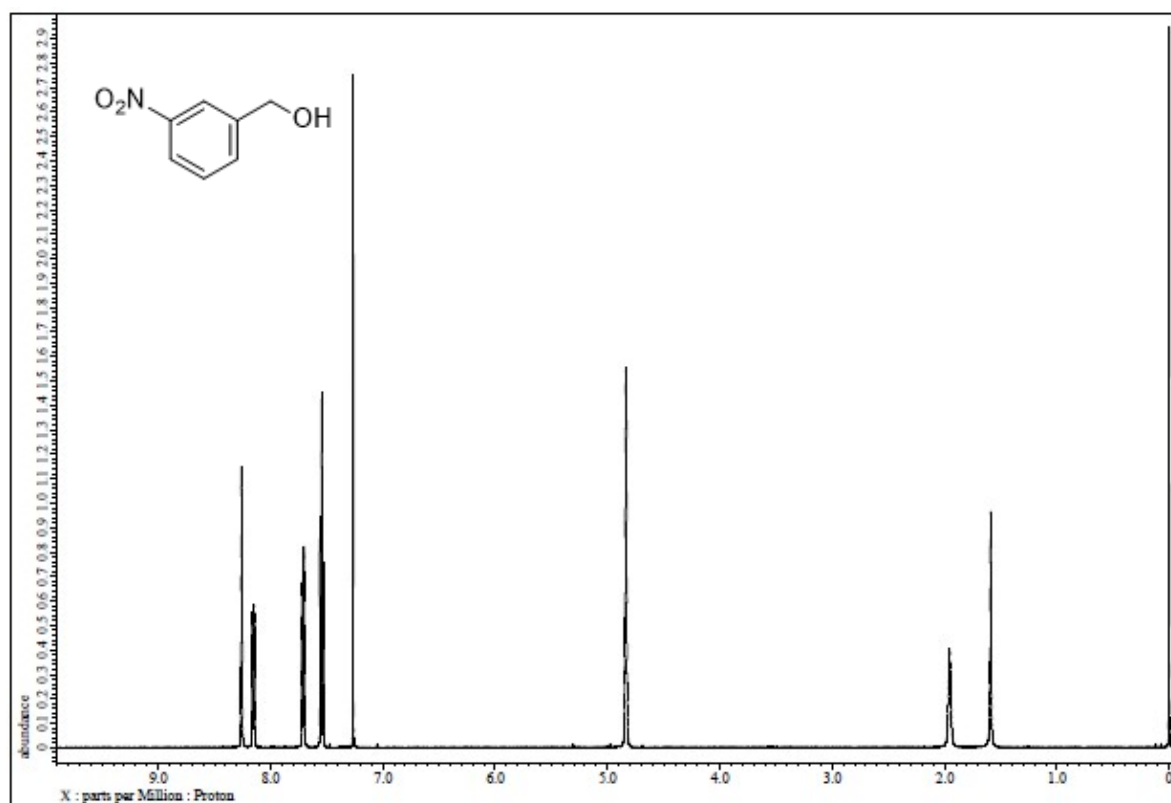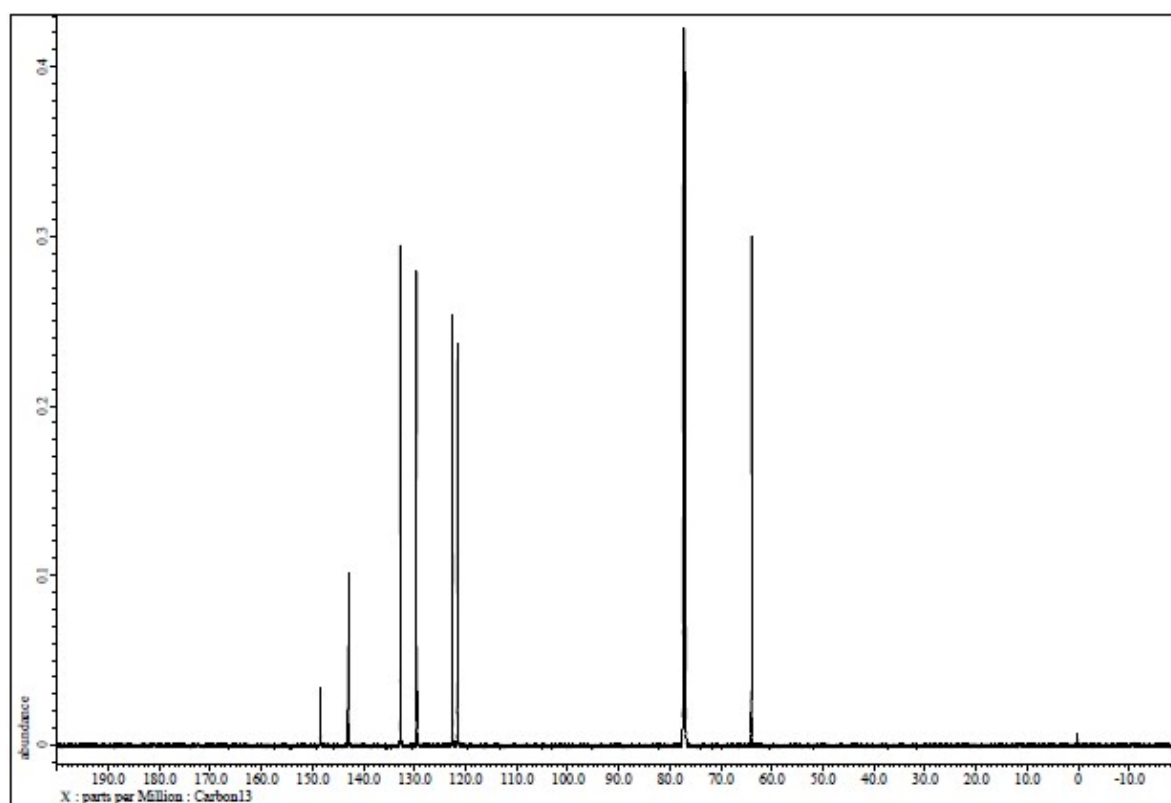

8e

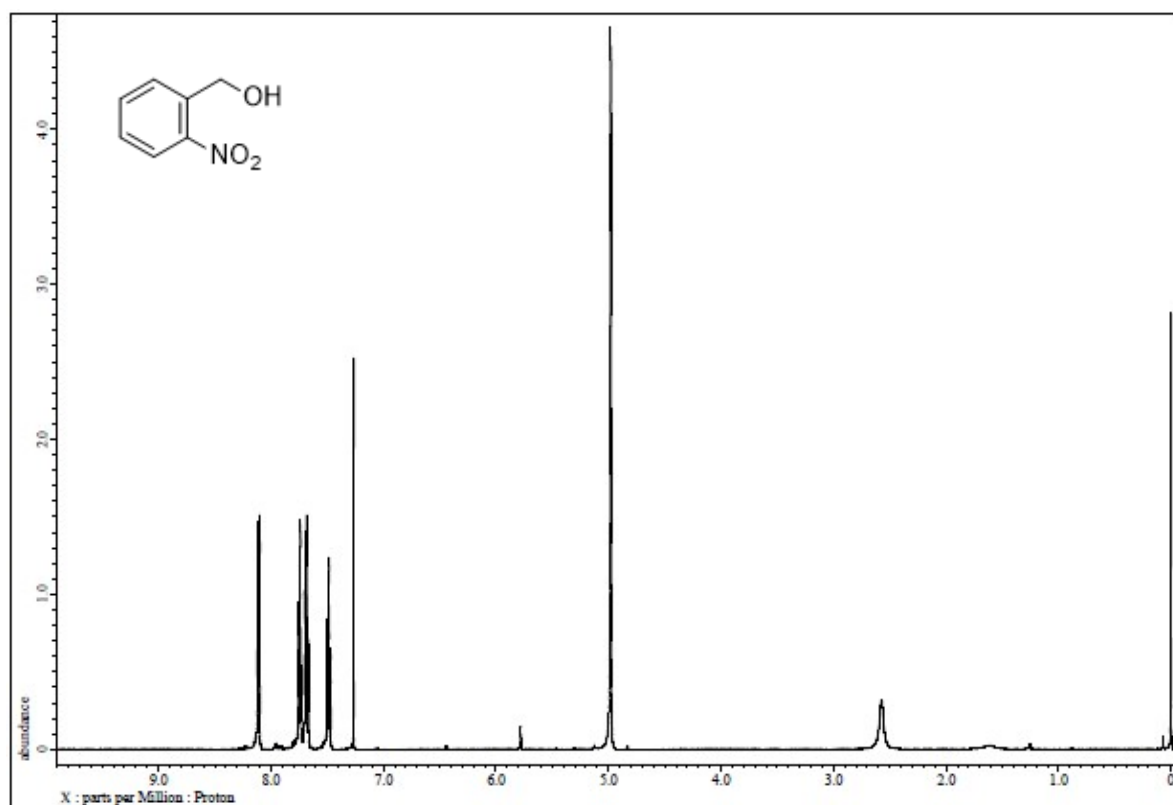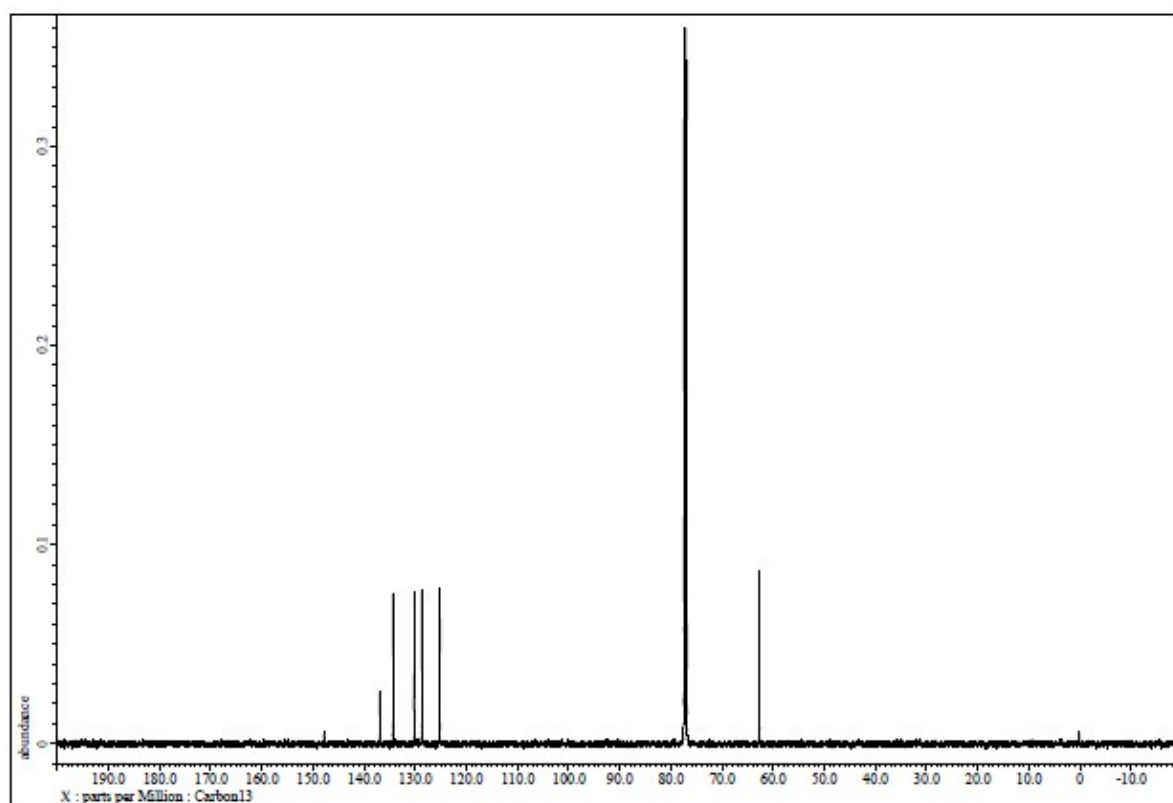

8f

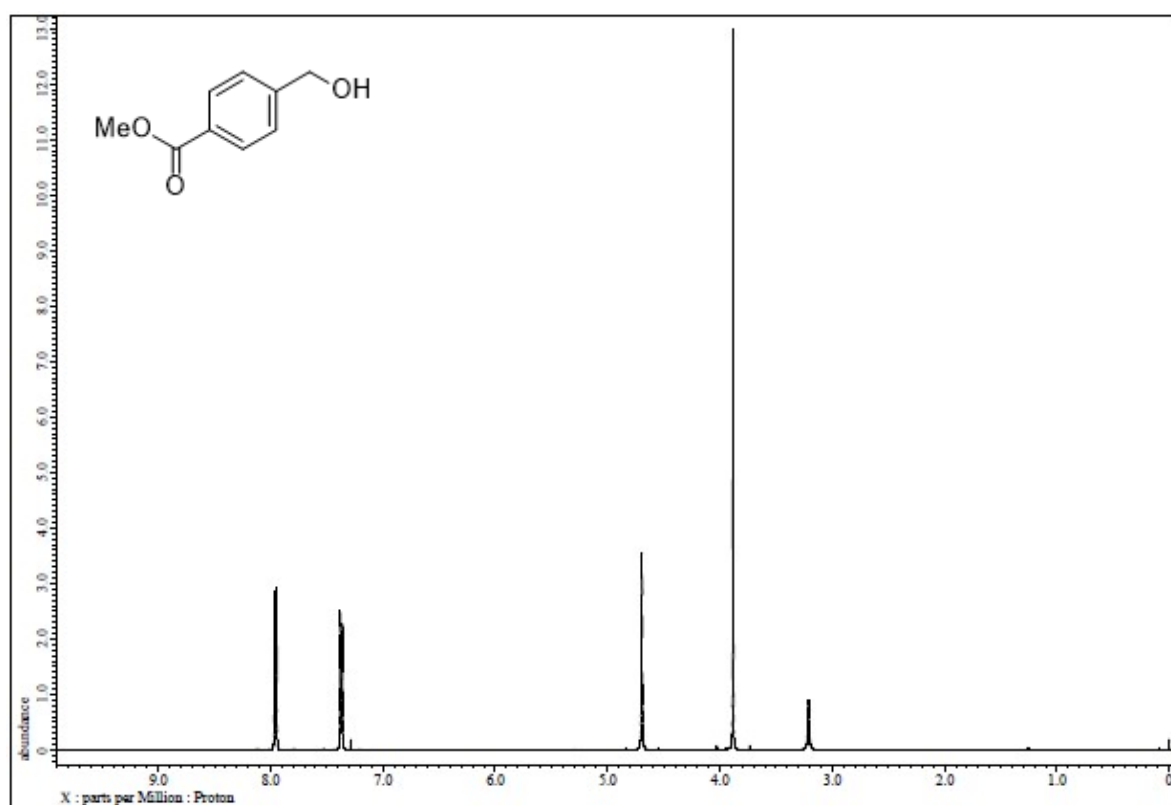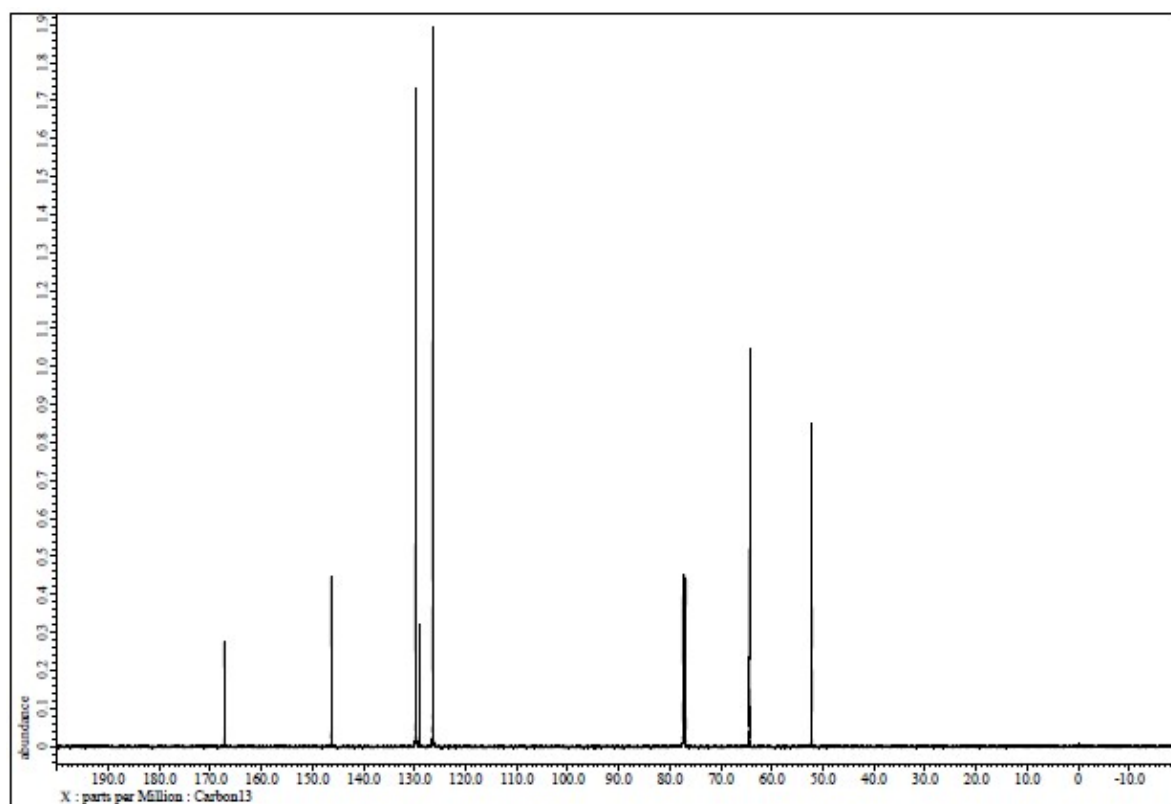

8g

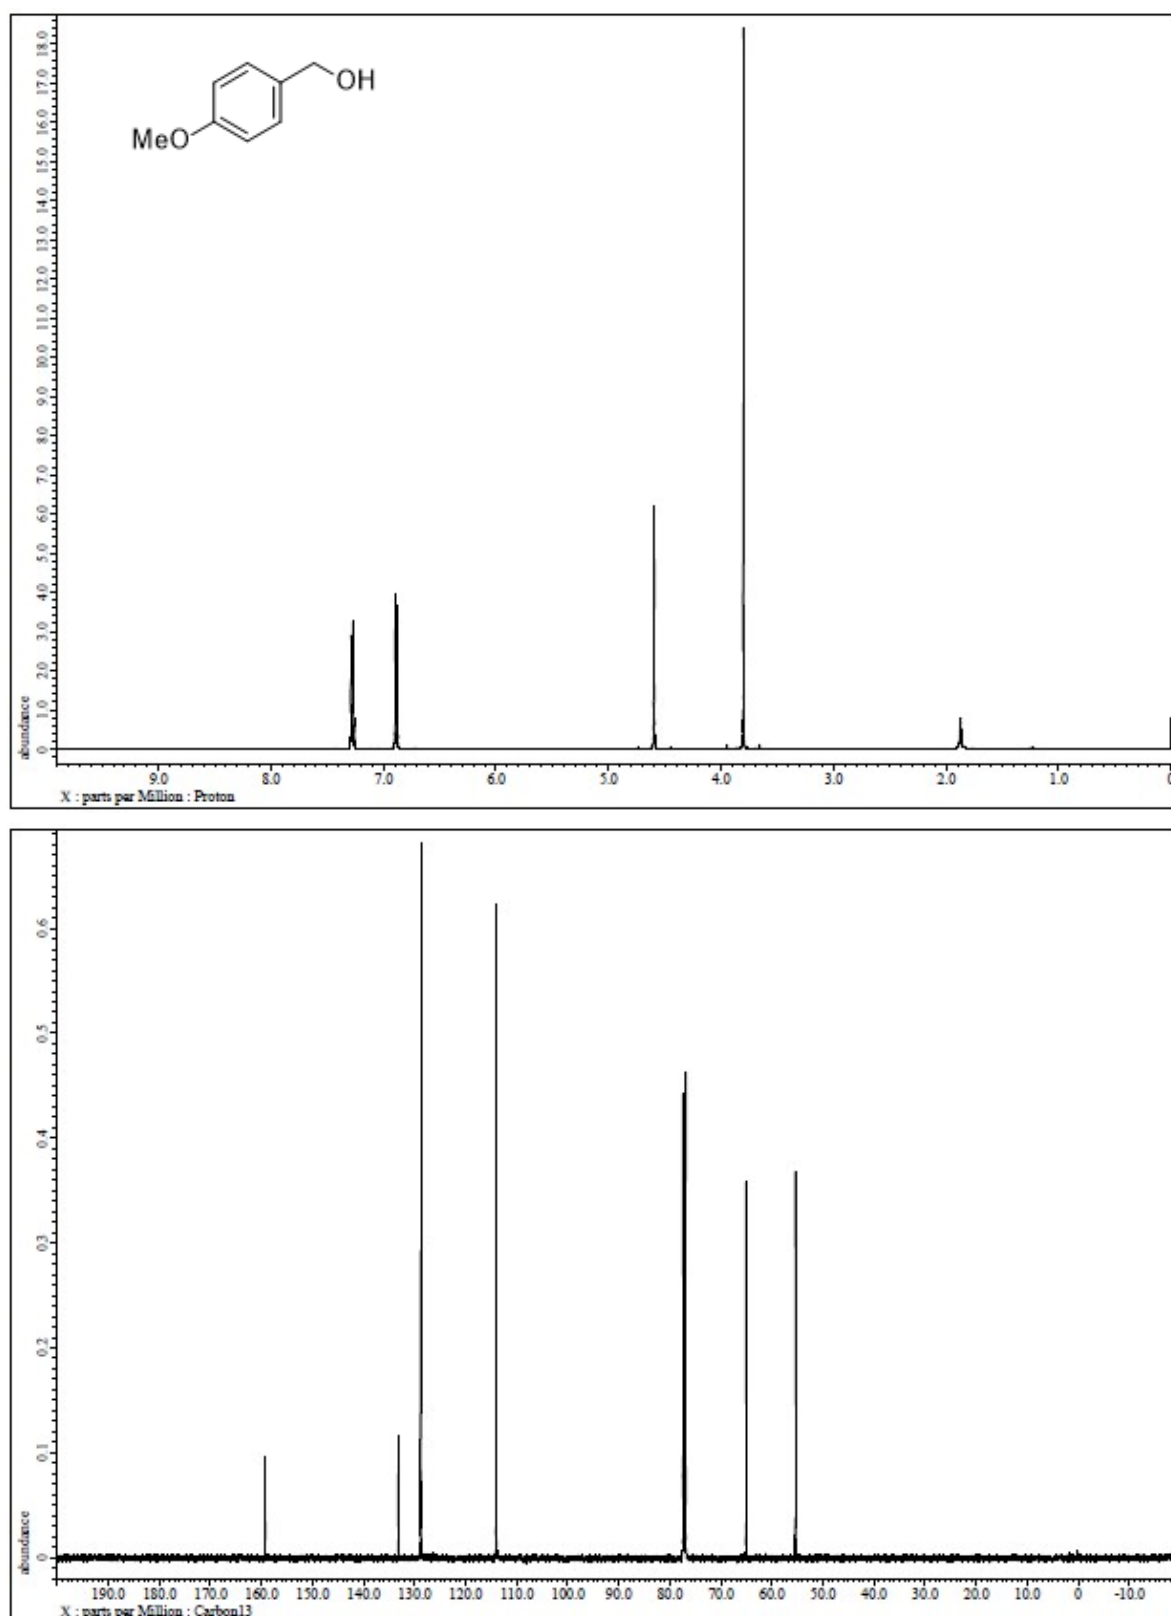

8h

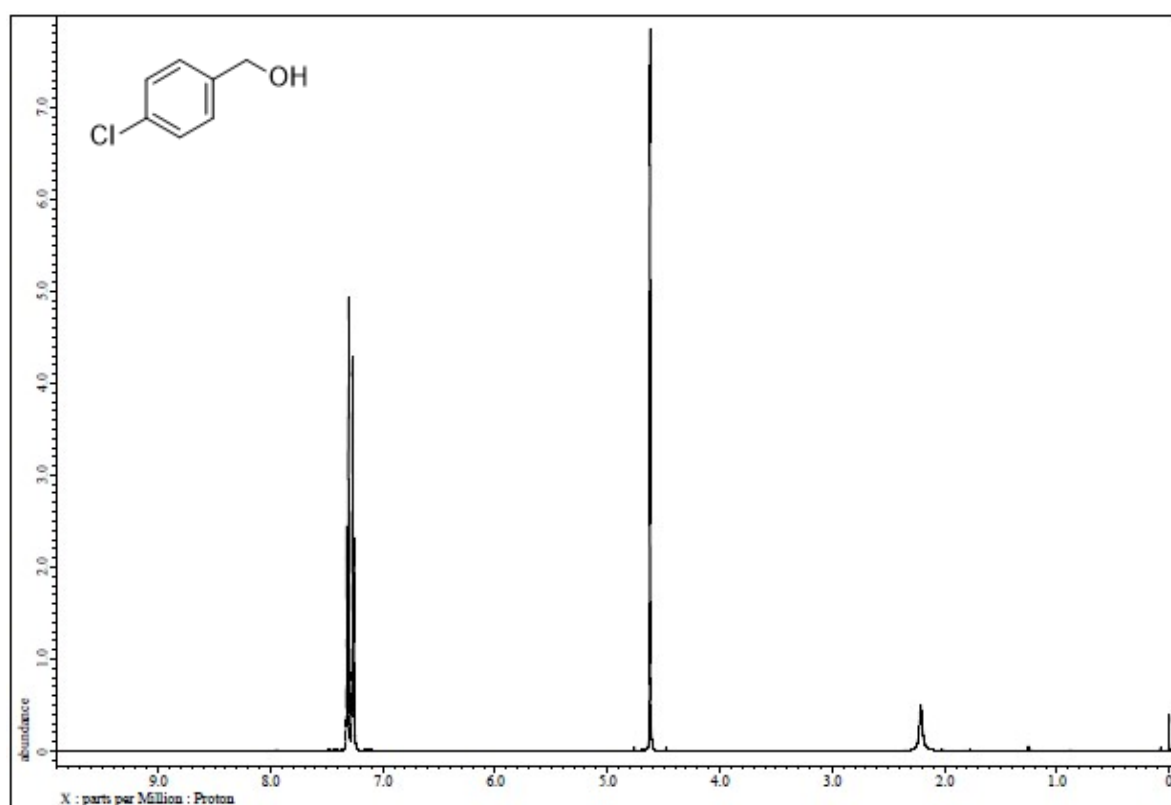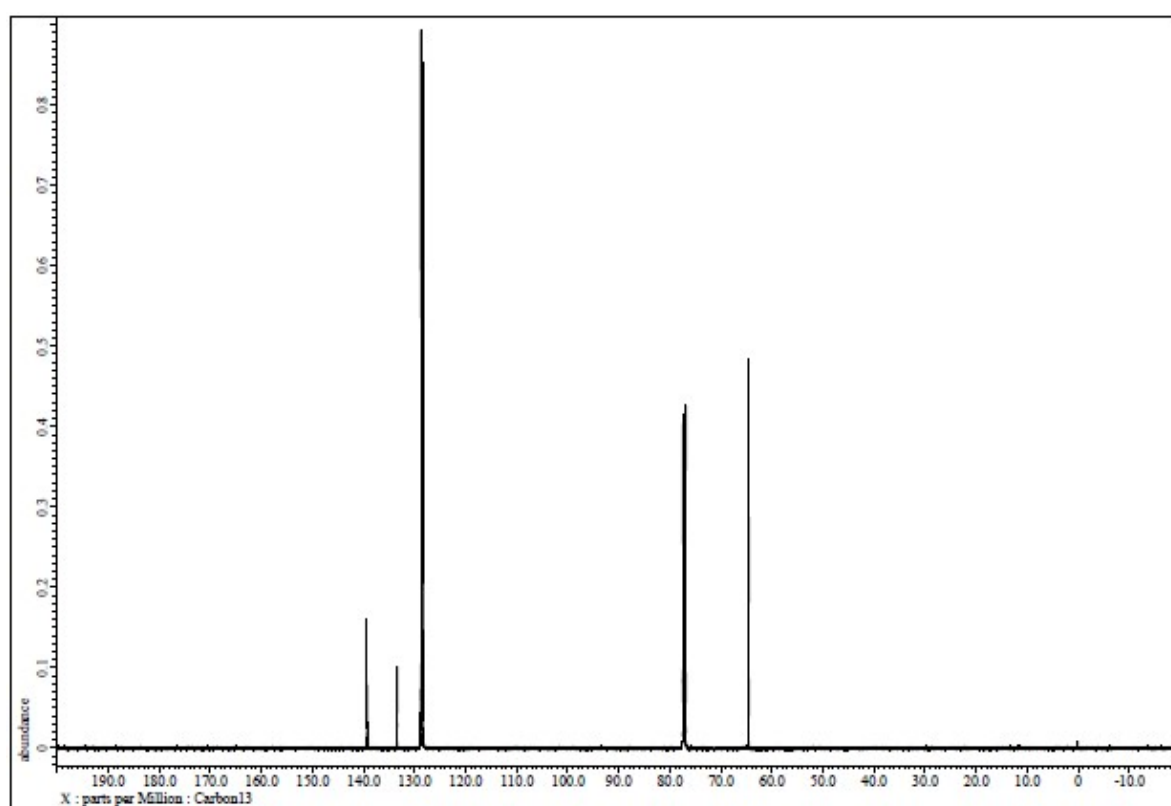

8i

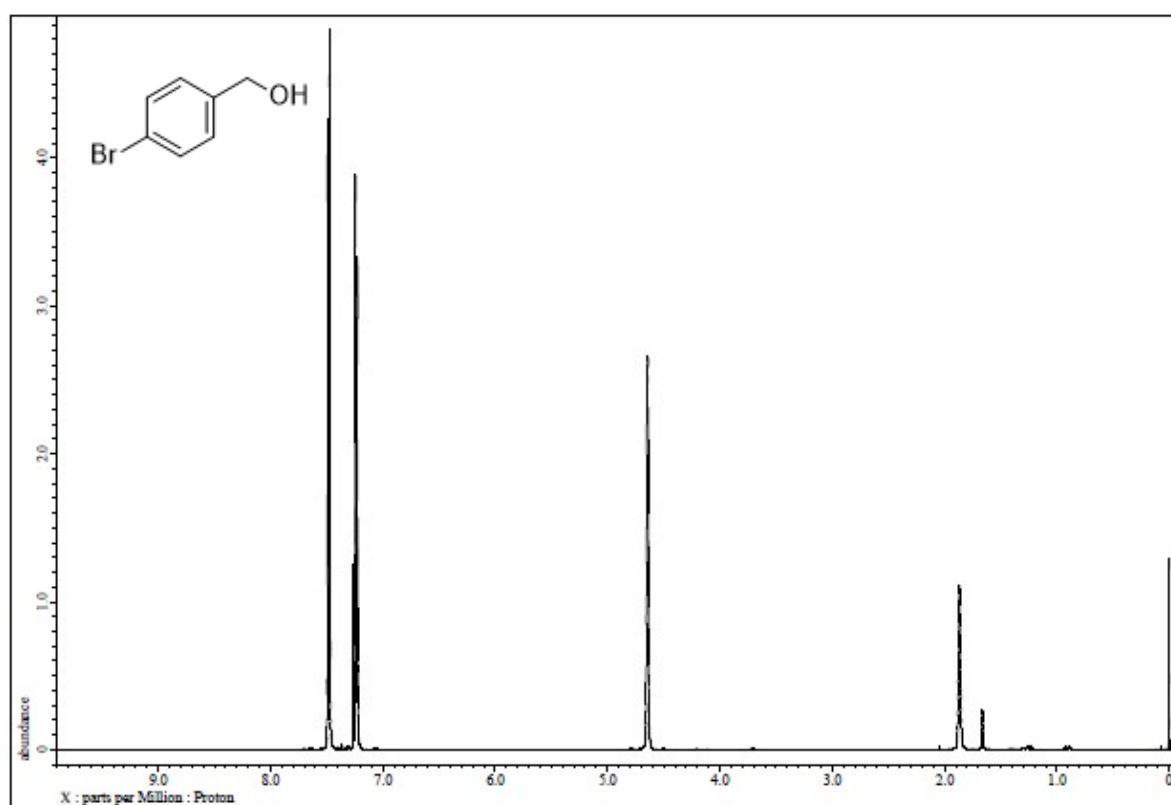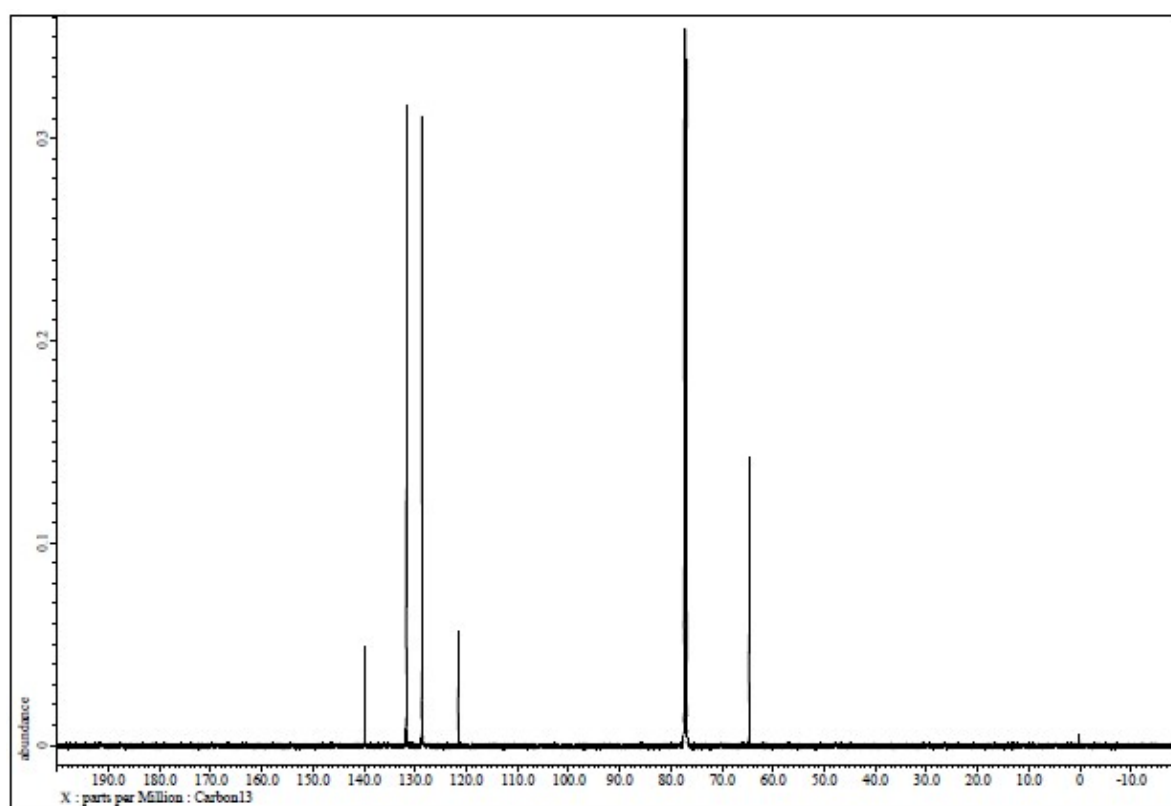



8j

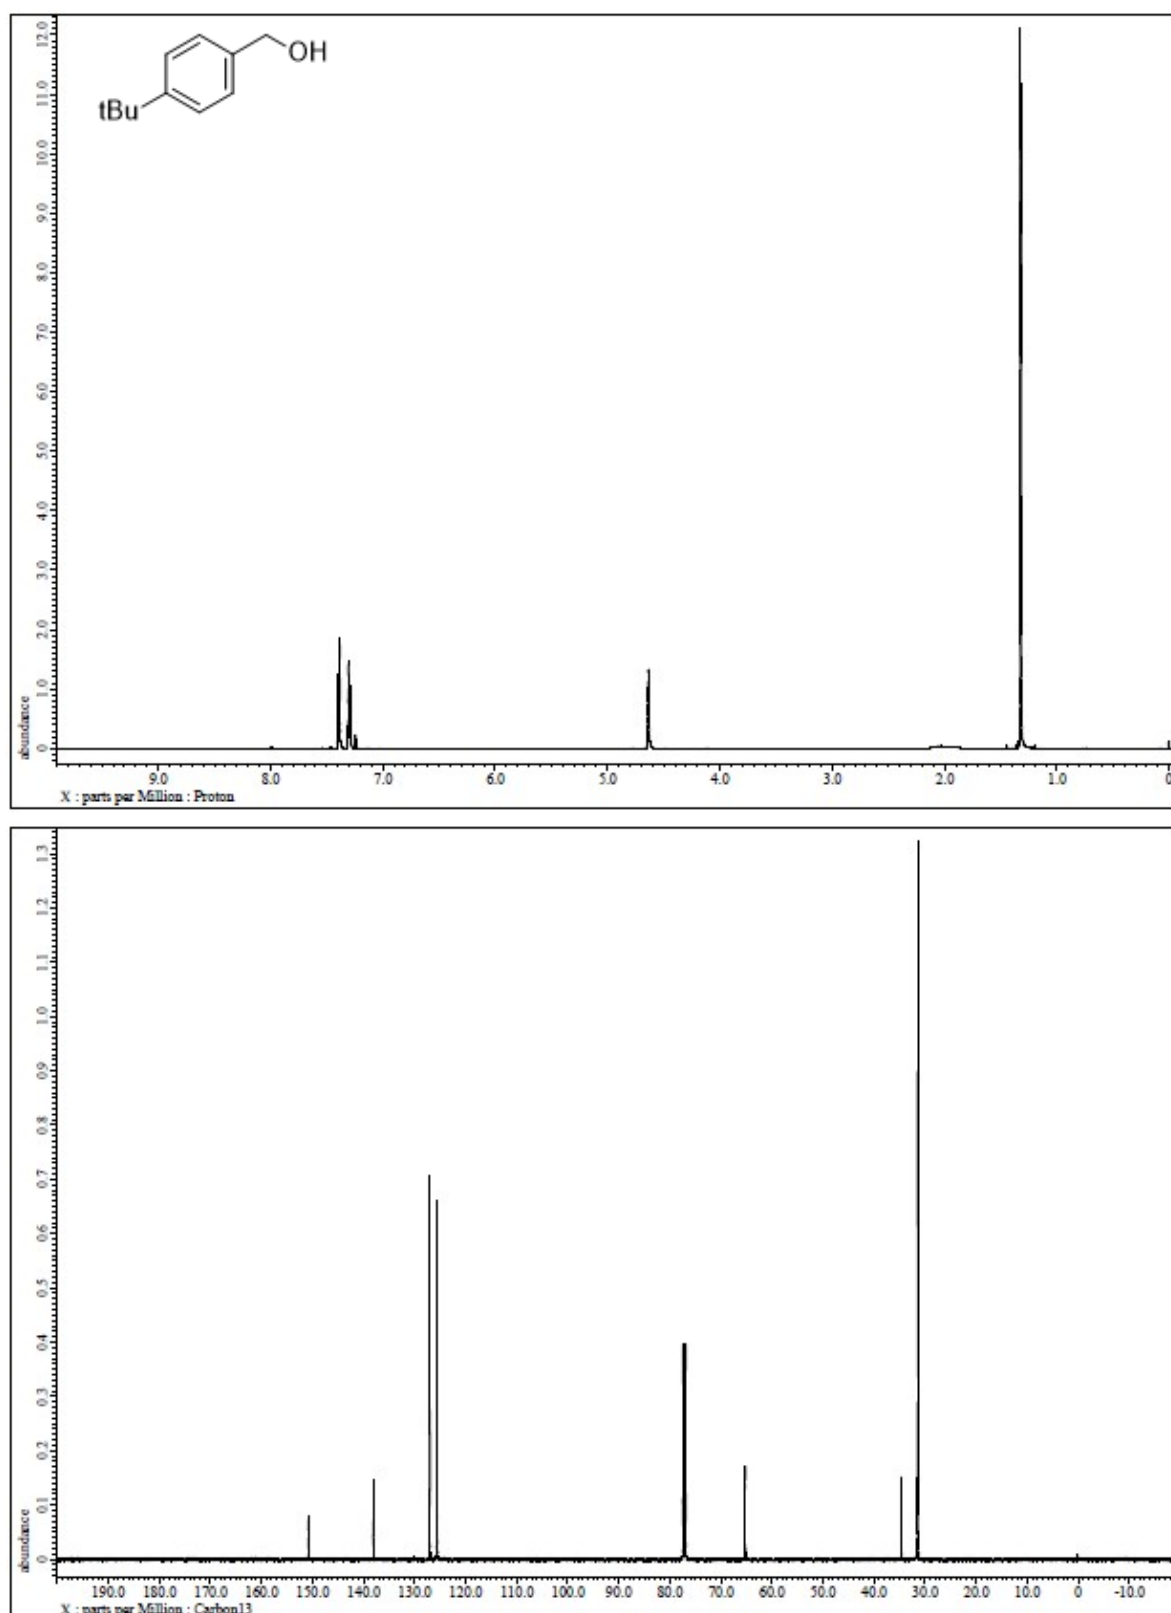

8k

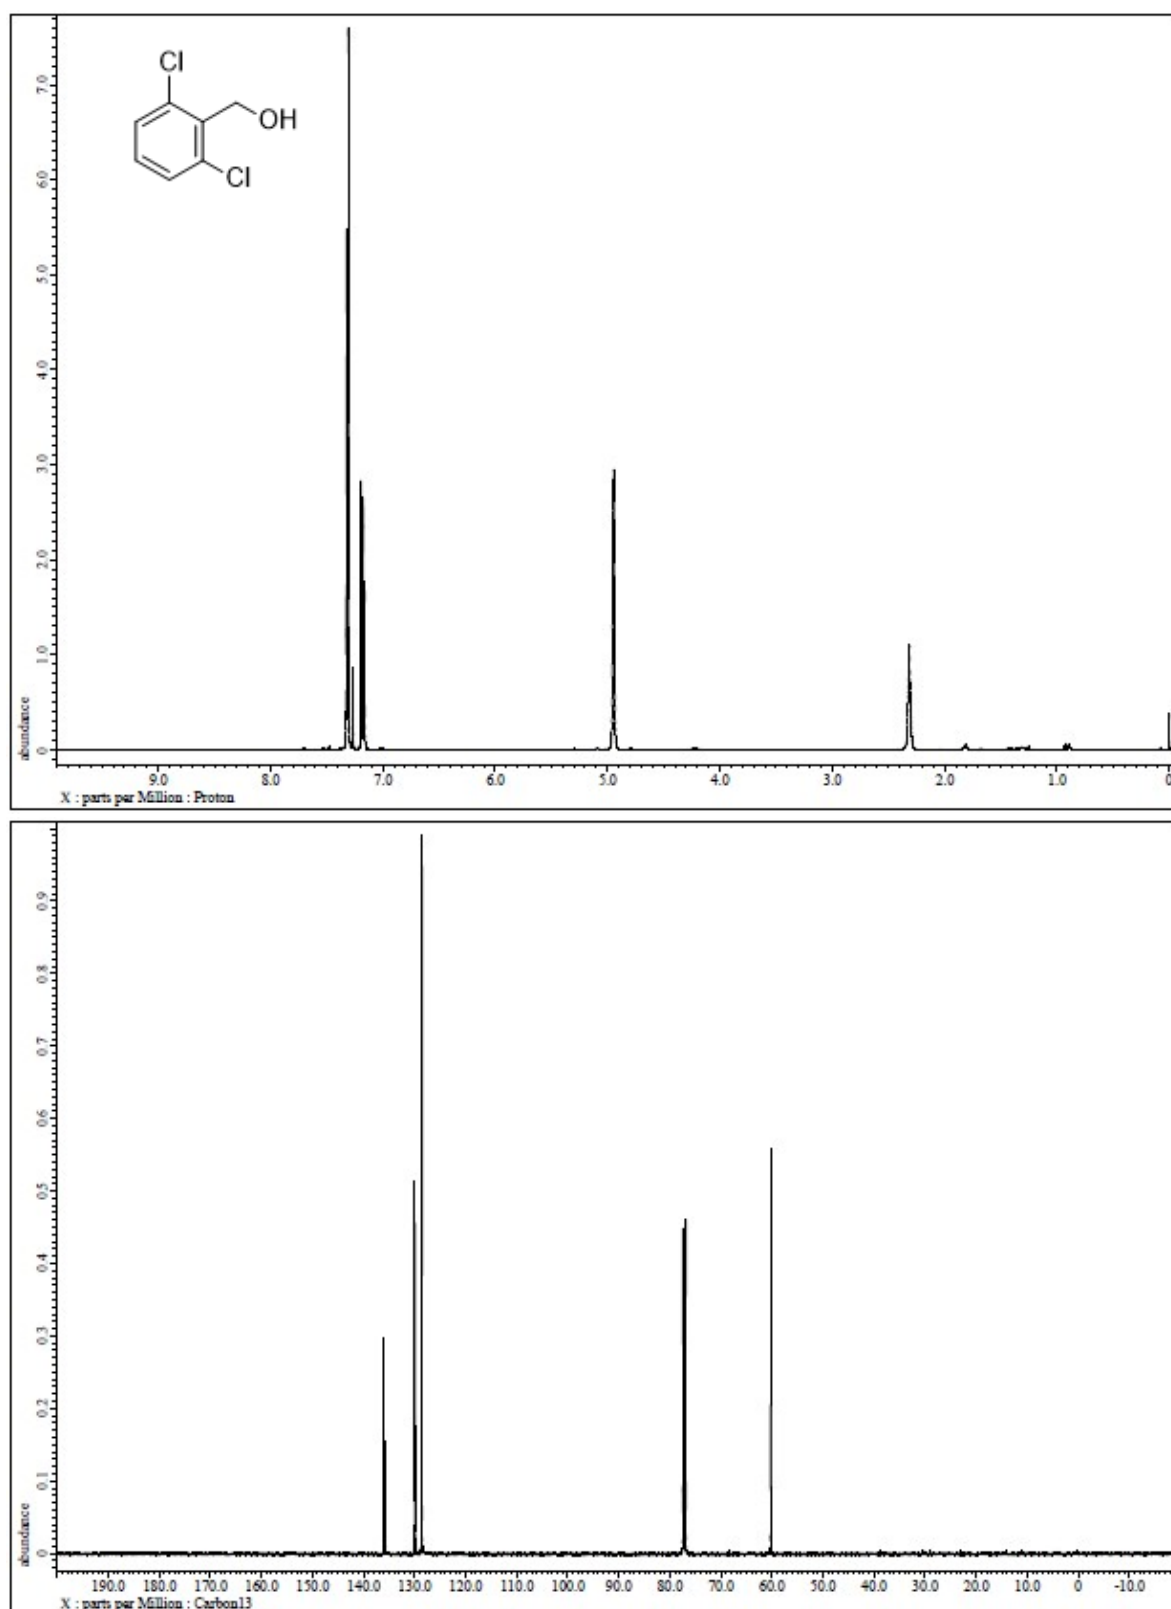

81

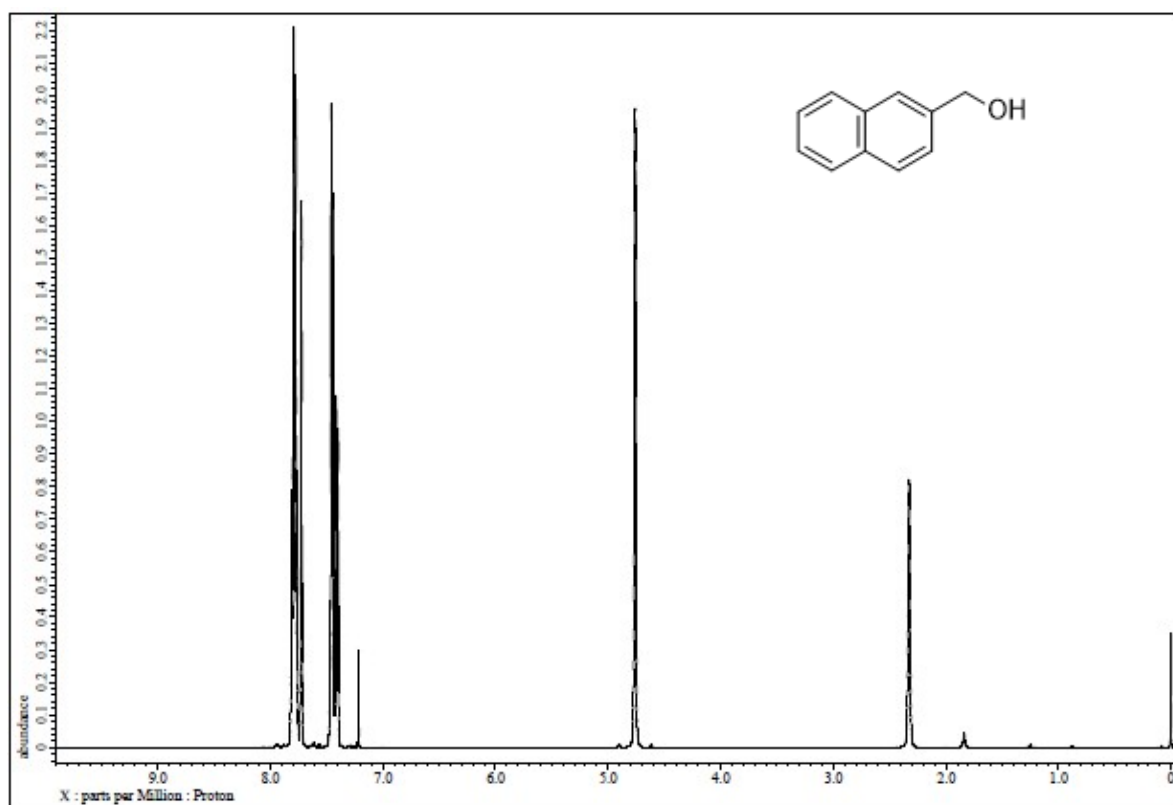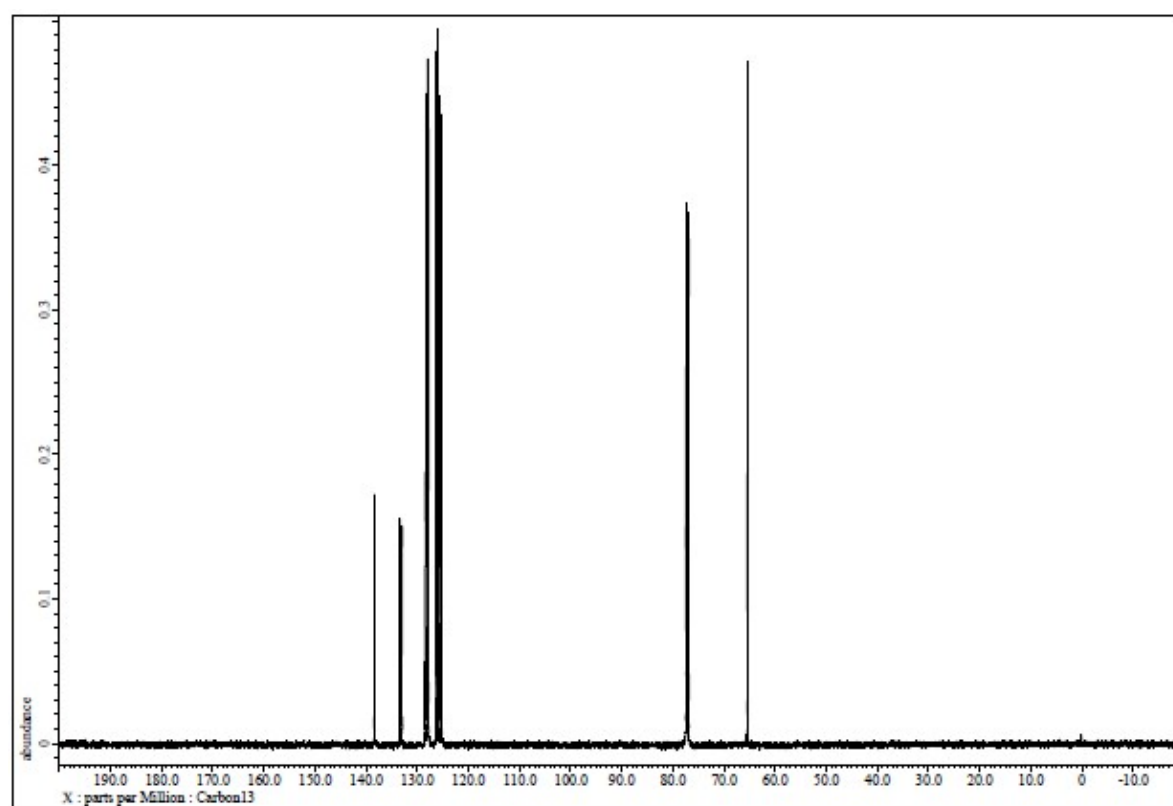

8m

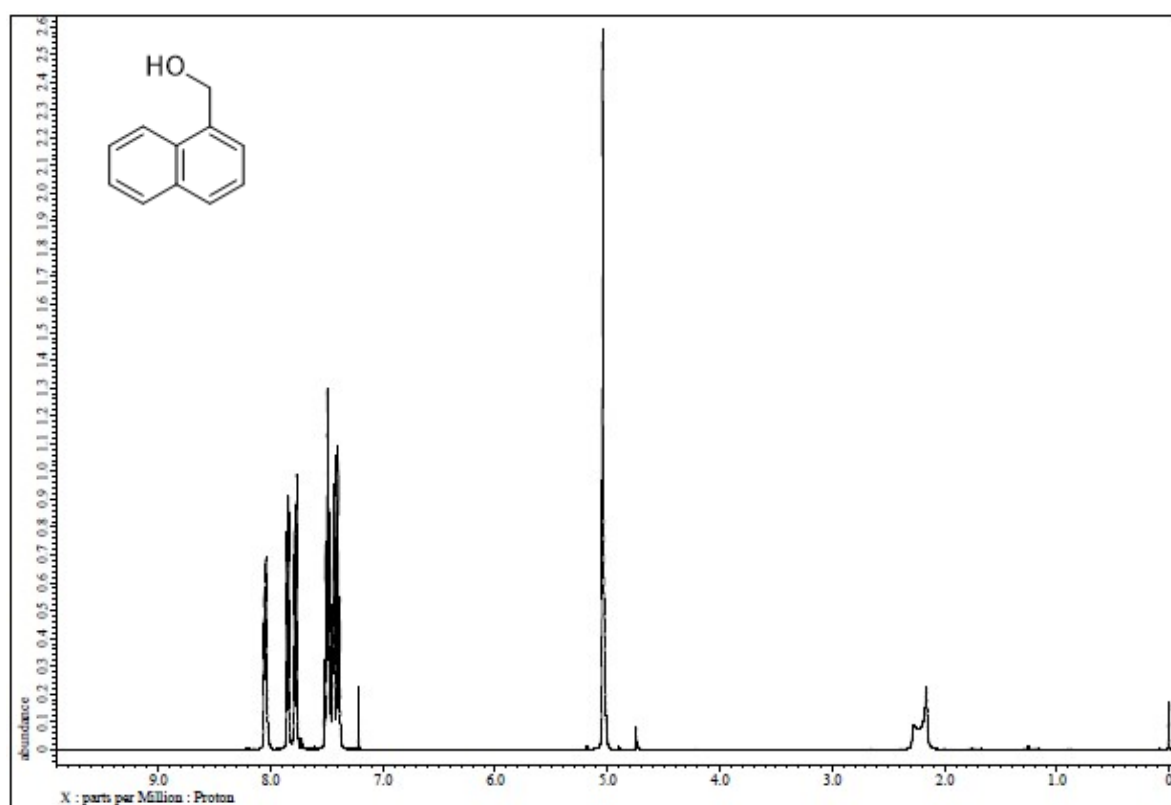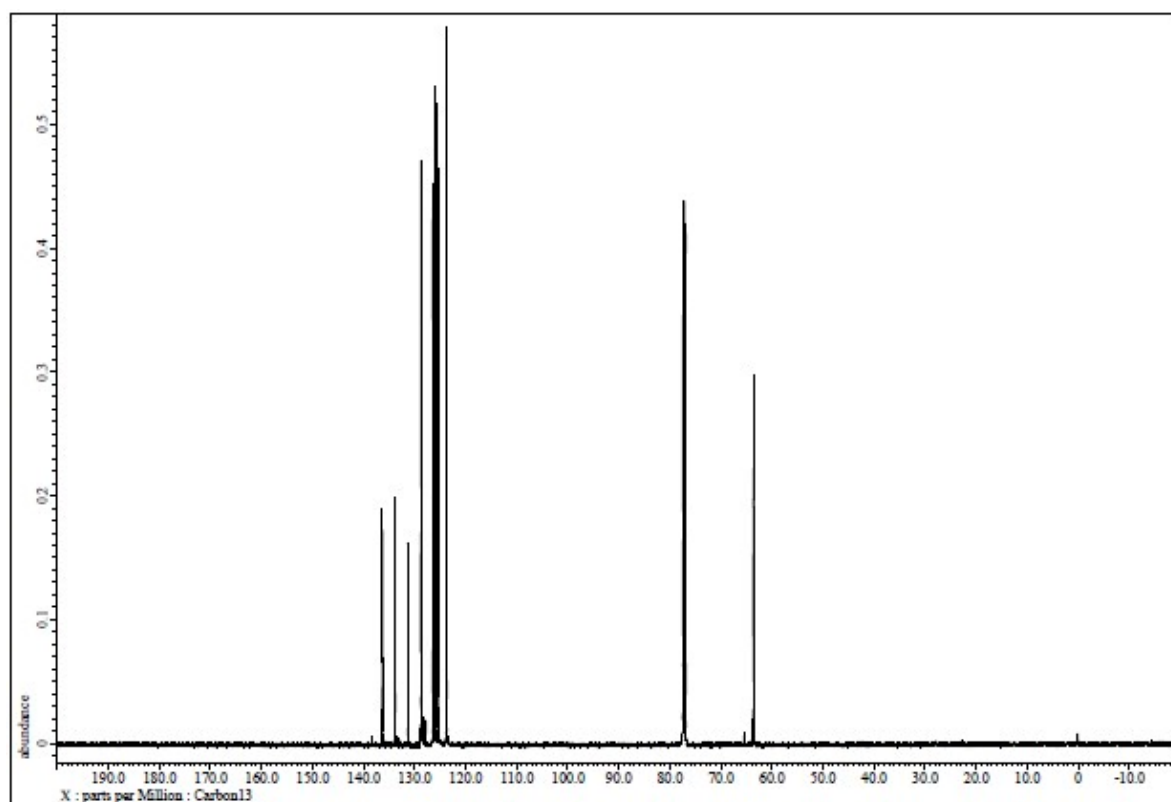

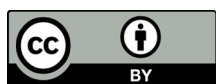

© 2019 by the authors. Submitted for possible open access publication under the terms and conditions of the Creative Commons Attribution (CC BY) license (<http://creativecommons.org/licenses/by/4.0/>).
